# Supplementary material
Source: publisher figshare collection journal article supplement (https://acs.figshare.com/ndownloader/files/5829675)
Supplement: Supplementary file 1 [file 5829675]

## Synthesis of the Left-hand Portion of Geldanamycin Using an Anti Glycolate Aldol Reaction

Merritt B. Andrus,\* Erik L. Meredith, B.B.V. Soma Sekhar

Department of Chemistry and Biochemistry, C100 BNSN,  
Brigham Young University, Provo, Utah 84602

mbandrus@chemdept.byu.edu

### Supplementary Material

**General Information.** Air and water sensitive reactions were performed in flame-dried glassware under a nitrogen atmosphere. Air and moisture sensitive reagents were introduced via dry syringe and cannula. Methylene chloride, toluene, acetonitrile, triethylamine and pyridine were distilled from  $\text{CaH}_2$ . THF and diethyl ether were distilled from sodium benzophenone ketyl. DMF was stored over molecular sieves. Reagents were purchased from Aldrich and Lancaster. Flash chromatography was carried out using 60-230 mesh silica gel. Radial chromatography was performed using 1, 2, and 4 mm plates loaded with 230-400 mesh PF-254 gypsum bound silica. Analytical thin-layer chromatography was performed with Merck silica gel 60 F<sub>254</sub>, 0.25 mm pre-coated TLC plates. TLC plates were visualized using UV<sub>254</sub> and cerium molybdate with charring. All  $^1\text{H}$  NMR spectra were obtained with either 300 or 500 MHz Varian spectrometers using TMS (0.0 ppm) or chloroform (7.26 ppm) as an internal reference. Signals are reported as m (multiplet), s (singlet), d (doublet), t (triplet), q (quartet), bs (broad singlet), ABq (AB quartet); and coupling constants are reported in hertz (Hz).  $^{13}\text{C}$  NMR were obtained with either 75 or 125 MHz Varian spectrometers using chloroform (77.2 ppm) as the internal standard. Infrared spectra were obtained on a Perkin Elmer FTIR instrument. Mass spectral data (HRMS, CI, EI, FAB) were obtained from the Brigham Young University mass spectrometry facility. Optical rotations were obtained using the sodium D line. Combustion analysis was performed by M-H-W Laboratories, Phoenix, AZ.

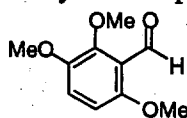

**2, 3, 6-Trimethoxybenzaldehyde.** A flame-dried 3-neck 1 L round bottom flask equipped with reflux condenser and a pressure equalized dropping funnel was charged with 1, 2, 4-trimethoxybenzene **5** (20.0 g, 119 mmol) and 400 mL of anhydrous  $\text{Et}_2\text{O}$ . The solution was then heated to reflux under a nitrogen atmosphere and  $n\text{-BuLi}$  (89.3 mL, 1.6 M hexanes) was *cautiously* added over 20 min via dropping funnel. The resulting milky solution was then refluxed for 2 h. After cooling to ambient temperature 37.0 mL (476 mmol) of dry DMF was slowly added over 15 min. The resulting bright yellow solution was then heated at reflux for an additional 2 h and then *cautiously* quenched upon cooling to ambient temperature with 120 mL of 6N HCl. After stirring for 1 h the aqueous layer was separated and extracted further with  $\text{Et}_2\text{O}$  (3 x 200mL). The combined organic layers were dried over anhydrous  $\text{MgSO}_4$  and concentrated. Flash chromatography (20%  $\text{EtOAc}$ /Hexanes) afforded the title compound, 15.8 g (68%) as a yellow oil. TLC  $R_f$  = 0.50 (50%  $\text{EtOAc}$ /Hexanes)  $^1\text{H}$  NMR ( $\text{CDCl}_3$ , 300 MHz)  $\delta$  10.44 (s, 1H),

7.08 (d,  $J = 9.3$  Hz, 1H), 6.64 (d,  $J = 9.0$  Hz, 1H), 3.91 (s, 3H), 3.84 (s, 3H), 3.83 (s, 3H);  $^{13}\text{C}$  NMR ( $\text{CDCl}_3$ , 75 MHz)  $\delta$  189.9, 155.0, 152.3, 147.0, 119.8, 119.3, 106.5, 62.2, 56.9, 56.4; IR (neat) 2938-2763, 1690, 1653, 1636, 1487, 1436; HRMS ( $\text{EI}^+$ ) found 196.0725  $\text{M}^+$ , calcd for  $\text{C}_{10}\text{H}_{12}\text{O}_4$  196.0736.

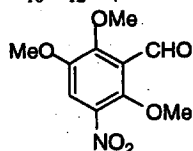

**5-Nitro-2,3,6-trimethoxybenzaldehyde (6).** A 1 L erlenmeyer flask was charged with 2,3,6-trimethoxybenzaldehyde (15.8 g, 80.6 mmol) and 80 mL glacial acetic acid and warmed to 60 °C. To the warm stirring solution, a premixed solution consisting of 42 mL of 70%  $\text{HNO}_3$  and 160 mL glacial acetic acid was slowly added. The resulting orange-yellow solution was stirred for 0.5 h at that temperature and then allowed to cool to ambient temperature. Then 130 mL of cold  $\text{H}_2\text{O}$  was added with crystallization and the mixture was then stored in the freezer overnight. The resulting crystals were then vacuum filtered and washed thoroughly with ice cold  $\text{H}_2\text{O}$  (3 x 50 mL) to afford the title compound, 16.1 g (83%) as light yellow crystals: TLC  $R_f = 0.20$  (20% EtOAc/Hex);  $^1\text{H}$  NMR ( $\text{CDCl}_3$ , 300 MHz)  $\delta$  10.38 (s, 1H), 7.63 (s, 1H), 4.05 (s, 3H), 3.97 (s, 3H), 3.94 (s, 3H);  $^{13}\text{C}$  NMR ( $\text{CDCl}_3$ , 75 MHz)  $\delta$  188.3, 155.9, 148.9, 148.6, 139.1, 125.1, 113.0, 64.7, 62.4, 56.6; IR (thin film) 3000-2800, 1698, 1576, 1522, 1479, 1429, 1404, 1362, 1261  $\text{cm}^{-1}$ ; mp = 106-108 °C; HRMS ( $\text{EI}^+$ ) found 241.0593  $\text{M}^+$ , calcd for  $\text{C}_{10}\text{H}_{11}\text{NO}_6$  241.0586; Anal. calcd for  $\text{C}_{10}\text{H}_{11}\text{NO}_6$ : C, 49.80; H, 4.60. Found: C, 49.66; H, 4.49.

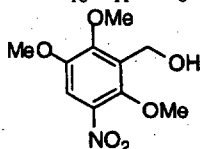

**5-Nitro-2,3,6-trimethoxybenzyl alcohol.** A 500 mL round bottom flask was charged with aldehyde 6 (8.20 g, 34.0 mmol) and 170 mL THF. To the stirred solution, at ambient temperature under a nitrogen atmosphere, was added  $\text{NaBH}_4$  (1.29 g, 34.0 mmol). The resulting light orange mixture was stirred for 1 h before being diluted with 30 mL of  $\text{H}_2\text{O}$  and quenched to a bright yellow solution with 5 mL of 1M HCl. The solution was allowed to stir for 0.5 h and then diluted with 150 mL of  $\text{Et}_2\text{O}$ . The mixture was washed with 100 mL of 1 N HCl and the layers were separated, and the aqueous layer was extracted further (3 x 150 mL) with  $\text{Et}_2\text{O}$ . The combined organic layers were dried over anhydrous  $\text{MgSO}_4$  and concentrated. The crude light orange residue was directly filtered over a silica gel plug (50% EtOAc/hexanes) to afford the title compound 8.14 g (98%) as a light yellow crystalline solid. TLC  $R_f = 0.18$  (30% EtOAc/hexanes);  $^1\text{H}$  NMR ( $\text{CDCl}_3$ , 300 MHz)  $\delta$  7.49 (s, 1H), 4.76 (bs, 2H), 4.01 (s, 3H), 3.94 (s, 3H), 3.91 (s, 3H), 2.41 (bs, 1H);  $^{13}\text{C}$  NMR ( $\text{CDCl}_3$ , 75 MHz)  $\delta$  152.9, 148.6, 147.5, 138.6, 130.2, 108.8, 63.9, 61.8, 56.4, 55.2; IR (thin film) 3421, 2947, 1576, 1522, 1484, 1427, 1341, 1284, 1252  $\text{cm}^{-1}$ ; mp = 68-70 °C HRMS ( $\text{CI}^+$ ) found 243.0738  $\text{M}^+$ , calcd 243.0743 for  $\text{C}_{10}\text{H}_{13}\text{NO}_6$ ; Anal. calcd for  $\text{C}_{10}\text{H}_{13}\text{NO}_6$ : C, 49.38; H, 5.39. Found: C, 49.55; H, 5.35.

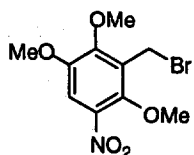

**5-Nitro-2,3,6-trimethoxybenzyl bromide (7).** A 250 mL round bottom flask was charged with 5-Nitro-2,3,6-trimethoxybenzyl alcohol (2.00 g, 8.23 mmol) and 20 mL of anhydrous Et<sub>2</sub>O. Then the solution was stirred under a nitrogen atmosphere at ambient temperature and dry pyridine (0.014 mL, 0.165 mmol) was added followed by dropwise addition of phosphorous tribromide (0.31 mL, 3.29 mmol) over 5 min. The resulting light yellow solution, with visible off white precipitate, was stirred for 0.5 h and then diluted with 20 mL Et<sub>2</sub>O and quenched with 20 mL H<sub>2</sub>O. The solution was allowed to stir further for 10 min and then the layers were separated. The aqueous phase was extracted further with Et<sub>2</sub>O (4 x 50 mL). The combined organic layers were washed with 100 mL of saturated NaHCO<sub>3</sub> solution. The organic layer was then dried over anhydrous MgSO<sub>4</sub> and concentrated. The residue was then filtered over a silica gel plug (30% EtOAc/hexanes) to afford the title compound, 2.35g (93 %) as a light yellow crystalline solid. The product may also be effectively recrystallized from EtOAc/hexanes. TLC *R<sub>f</sub>* = 0.71 (30% EtOAc/hexanes); <sup>1</sup>H NMR (CDCl<sub>3</sub>, 300 MHz) δ 7.52 (s, 1H), 4.62 (s, 2H), 4.09 (s, 3H), 4.01 (s, 3H), 3.92 (s, 3H); <sup>13</sup>C NMR (CDCl<sub>3</sub>, 75 MHz) δ 153.0, 148.6, 147.6, 138.2, 128.3, 109.5, 63.2, 61.5, 56.5, 21.4; mp = 100-102 °C; HRMS (CI<sup>+</sup>) found 305.9972 [M+H]<sup>+</sup>, calcd 305.9977 for C<sub>10</sub>H<sub>12</sub>BrNO<sub>5</sub>; Anal. calcd for C<sub>10</sub>H<sub>12</sub>BrNO<sub>5</sub>: C, 39.24; H, 3.95. Found: C, 39.45; H, 4.09.

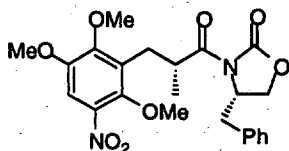

**(4S)-4-Benzyl-3-[(2R)-2-methyl-3-(5-nitro-2,3,6-trimethoxyphenyl)-propionyl]-oxazolidin-2-one (8).** A flame dried 250 mL round bottom flask was charged with (4S)-4-benzyl-3-propionyl-oxazolidin-2-one (3.42 g, 14.7 mmol) and 65 mL of anhydrous THF. The solution was cooled to -78 °C under a nitrogen atmosphere and NaHMDS (16.1 mL, 1.0 M THF) was added dropwise. The resulting solution was stirred at -78 °C for 10 minutes and then bromide 7 (4.94 g, 16.1 mmol) was added slowly as a THF (10 mL) solution down the wall of the flask. The mixture was then allowed to stir for 3.5 h before being quenched at -78 °C by the careful addition of 10 mL of saturated NH<sub>4</sub>Cl solution. Upon warming to ambient temperature the solution was diluted with 200 mL Et<sub>2</sub>O and 150 mL of saturated NH<sub>4</sub>Cl solution. Separation of the organic layer was followed by further extraction of the aqueous layer with Et<sub>2</sub>O (4 x 200 mL). The combined organic layers were dried over anhydrous MgSO<sub>4</sub> and concentrated. The diastereoselectivity was >19:1 as determined by <sup>1</sup>H NMR of the crude reaction material. Flash chromatography (gradient 10-30% EtOAc/hexanes) afforded the title compound, 5.80 g (88%) as a light yellow foam. TLC *R<sub>f</sub>* = 0.38 (30% EtOAc/hexanes); [α]<sub>D</sub><sup>25</sup> = +18.6 ° (c 0.14, CHCl<sub>3</sub>); <sup>1</sup>H NMR (CDCl<sub>3</sub>, 300 MHz) δ 7.42 (s, 1H), 7.36-7.24 (m's, 3H), 7.22-7.19 (m, 2H), 4.70-4.63 (m, 1H), 4.21-4.09 (m, 3H), 3.98 (s, 3H), 3.89 (s, 3H), 3.86 (s, 3H), 3.34 (dd, *J* = 3.0 Hz, 13.5 Hz, 1H), 3.14 (dd, *J* = 13.2 Hz, 6.3 Hz, 1H), 3.02 (dd, *J* = 7.8 Hz, 13.2 Hz, 1H), 2.73 (dd, *J* = 9.6 Hz, 13.5 Hz, 1H), 1.16 (d, *J* = 6.9 Hz, 3H); <sup>13</sup>C NMR (CDCl<sub>3</sub>, 75 MHz) δ 176.8, 153.2, 148.4, 148.1, 138.2, 135.7, 129.6, 129.1, 128.9, 127.4, 107.8, 66.2, 62.7, 61.2, 56.4, 55.7, 37.8, 37.6, 27.9, 17.5; IR (thin

film) 3024, 2973, 2940, 2838, 1778, 1697, 1575, 1518, 1481, 1455, 1424, 1385, 1347, 1282, 1247, 1210  $\text{cm}^{-1}$ ; HRMS ( $\text{CI}^+$ ) found 458.1682  $\text{M}^+$ , calcd 485.1689 for  $\text{C}_{23}\text{H}_{26}\text{N}_2\text{O}_8$ .

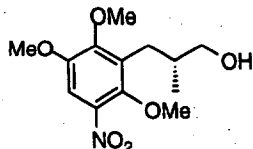

**(2R)-2-Methyl-3-(5-nitro-2,3,6-trimethoxyphenyl)propan-1-ol.** A 250 mL round bottom flask was charged with adduct **8** (2.35 g, 5.13 mmol), 65 mL  $\text{Et}_2\text{O}$  and 0.2 mL of  $\text{H}_2\text{O}$ . The resulting solution was then cooled to  $0^\circ\text{C}$  under a nitrogen atmosphere and  $\text{LiBH}_4$  (5.60 mL, 2.0 M THF) was slowly added. The resulting cloudy solution was stirred for 0.5 h at  $0^\circ\text{C}$  and then quenched by careful addition of 30 mL of saturated  $\text{NH}_4\text{Cl}$  solution. The layers were separated and the aqueous layer was extracted further with  $\text{CH}_2\text{Cl}_2$  (3 x 50 mL) and the combined organic layers were washed with brine (100 mL). The organic layer was separated, dried over anhydrous  $\text{MgSO}_4$  and concentrated. Flash chromatography (gradient 30-40% EtOAc/hexanes) afforded title compound, 1.40 g (96%), as a light yellow sticky solid. TLC  $R_f$  = 0.19 (30% EtOAc/hexanes);  $[\alpha]_D^{23}$  =  $-14.5^\circ$  ( $c$  0.20,  $\text{CHCl}_3$ );  $^1\text{H}$  NMR ( $\text{CDCl}_3$ , 300 MHz)  $\delta$  7.41 (s, 1H), 3.94 (s, 3H), 3.91 (s, 3H), 3.87 (s, 3H), 3.39 (app t,  $J$  = 5.1 Hz, 2H), 2.74 (dd,  $J$  = 12.9 Hz, 8.4 Hz, 1H), 2.63 (dd,  $J$  = 12.9 Hz, 6.3 Hz, 1H), 2.21 (app t,  $J$  = 6.0 Hz, 1H), 2.00-1.86 (m, 1H), 1.00 (d,  $J$  = 6.9 Hz, 3H);  $^{13}\text{C}$  NMR ( $\text{CDCl}_3$ , 75 MHz)  $\delta$  152.6, 148.6, 147.6, 138.6, 130.7, 107.2, 66.6, 62.8, 61.2, 56.3, 36.6, 27.9, 17.4; IR (thin film) 3417, 2942, 2871, 1575, 1519, 1480, 1424, 1339, 1282, 1245  $\text{cm}^{-1}$ ; HRMS ( $\text{CI}^+$ ) found 286.1290  $[\text{M}+\text{H}]^+$ , calcd 286.1289 for  $\text{C}_{13}\text{H}_{20}\text{NO}_6$ .

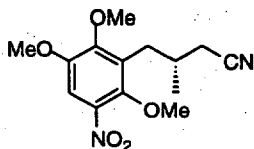

**(3R)-3-Methyl-4-(5-nitro-2,3,6-trimethoxyphenyl)butyronitrile (9).** A flame-dried 100 mL round bottom flask was charged with (2R)-2-Methyl-3-(5-nitro-2,3,6-trimethoxyphenyl)propan-1-ol (4.30 g, 15.1 mmol) and 50 mL of anhydrous  $\text{Et}_2\text{O}$  and cooled to  $0^\circ\text{C}$  under a nitrogen atmosphere. To the stirred solution was added triphenylphosphine (7.91 g, 30.2 mmol) and then DEAD (4.75 mL, 30.2 mmol) dropwise over a period of 15 min. The thick mixture, with a light yellow precipitate, was stirred for 10 min further before acetone cyanohydrin (1.6 mL, 17.5 mmol) was introduced dropwise as an anhydrous  $\text{Et}_2\text{O}$  solution (10 mL) with the disappearance of the precipitate. The resulting solution was allowed to warm to ambient temperature and stirred for 20 h. The solution was then filtered directly over a silica gel plug (eluting with 50% EtOAc/hexanes). Concentration was followed by flash chromatography (gradient 10-20% EtOAc/hexanes) to afford the title compound 3.60 g (81%) as a viscous yellow oil. TLC  $R_f$  = 0.39 (30% EtOAc/hexanes);  $[\alpha]_D^{25}$  =  $-24.3^\circ$  ( $c$  0.14,  $\text{CHCl}_3$ );  $^1\text{H}$  NMR ( $\text{CDCl}_3$ , 300 MHz)  $\delta$  7.44 (s, 1H), 3.96 (s, 3H), 3.91 (s, 3H), 3.86 (s, 3H), 2.76 (dd,  $J$  = 7.8, 12.6 Hz, 1H), 2.71 (dd,  $J$  = 6.9, 12.9 Hz, 1H), 2.30 (app d,  $J$  = 6.3 Hz, 2H), 2.26-2.13 (m, 1H), 1.11 (d,  $J$  = 6.6 Hz, 3H);  $^{13}\text{C}$  NMR ( $\text{CDCl}_3$ , 75 MHz)  $\delta$  152.6, 148.5, 147.7, 138.4, 129.1, 118.9, 107.7, 62.6, 61.1, 56.3, 31.6, 30.7, 24.3, 19.8; IR (neat) 2941, 1748, 1731, 1575, 1521, 1481, 1424, 1340, 1288, 1247  $\text{cm}^{-1}$ ; HRMS ( $\text{CI}^+$ ) found 294.1212  $\text{M}^+$ , calcd 294.1216 for  $\text{C}_{14}\text{H}_{18}\text{N}_2\text{O}_5$ .

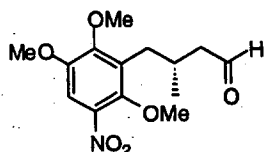

**(3R)-3-Methyl-4-(5-nitro-2,3,6-trimethoxyphenyl)-butyraldehyde (3).** A flame-dried 25 mL round bottom flask was charged with cyanide **9** (0.150 g, 0.510 mmol) and 6.5 mL of dry toluene. The solution was cooled to  $-78^{\circ}\text{C}$  under a nitrogen atmosphere and DIBAL (0.68 mL, 1.5 M toluene) was added slowly. The resulting reddish-orange solution was allowed to warm to ambient temperature over 1 h at which time 0.2 mL of acetone, 0.2 mL EtOAc, and 0.2 mL pH 7 phosphate buffer were added in sequence. The mixture was then stirred vigorously for 20 min and then anhydrous  $\text{Na}_2\text{SO}_4$  was added maintaining the vigorous stirring for an additional 20 min. The resulting yellow solution was then filtered over a pad of silica gel and  $\text{Na}_2\text{SO}_4$ . Concentration and subsequent purification via radial chromatography (20% EtOAc/hexanes) afforded the title compound, upon concentration, 0.140 g (92%) as a light yellow viscous oil. TLC  $R_f = 0.41$  (30% EtOAc/hexanes);  $[\alpha]_D^{25} = -17.0^{\circ}$  ( $c$  1.0,  $\text{CHCl}_3$ )  $^1\text{H}$  NMR ( $\text{CDCl}_3$ , 300 MHz)  $\delta$  9.71 (app t,  $J = 2.0$  Hz, 1H), 7.42 (s, 1H), 3.94 (s, 3H), 3.91 (s, 3H), 3.84 (s, 3H), 2.67 (d,  $J = 6.6$  Hz, 2H), 2.50-2.26 (m's, 3H), 0.98 (d,  $J = 6.6$  Hz, 3H);  $^{13}\text{C}$  NMR ( $\text{CDCl}_3$ , 75 MHz)  $\delta$  202.6, 152.8, 148.5, 147.8, 138.4, 130.0, 107.4, 62.5, 61.0, 56.3, 50.4, 31.3, 29.0, 20.4; IR (neat) 2941, 1683, 1558, 1521, 1480, 1457, 1339, 1287, 1246  $\text{cm}^{-1}$ ; HRMS ( $\text{CI}^+$ ) found 297.1209  $\text{M}^+$ , calcd 297.1212 for  $\text{C}_{14}\text{H}_{19}\text{NO}_6$ .

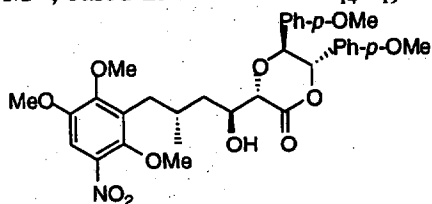

**(3S, 5S, 6S)-3-[(1S, 3R)-1-Hydroxy-3-methyl-4-(5-nitro-2,3,6-trimethoxyphenyl)-butyl]-5,6-bis-(4-methoxy-phenyl)-[1,4]dioxan-2-one (12).** A flame-dried 100 mL round bottom flask was charged with oxypyrrone **4** (0.233 g, 0.740 mmol) and 20 mL dry  $\text{CH}_2\text{Cl}_2$ . The solution was cooled to  $-78^{\circ}\text{C}$  under a nitrogen atmosphere and  $\text{Et}_3\text{N}$  (0.26 mL, 1.865 mmol) was added dropwise followed by  $c\text{Hex}_2\text{BOTf}$  (1.85 mL, 1.0 M hexane) which was also added dropwise over 5 min. The resulting solution was stirred at  $-78^{\circ}\text{C}$  for 3 h at which time aldehyde **3** (0.264 g, 0.888 mmol) was added in 1 mL dry  $\text{CH}_2\text{Cl}_2$  dropwise over 10 min. The resulting solution was stirred at  $-78^{\circ}\text{C}$  for 3 h at which time it was quenched at that same temperature by the addition of pH 7 buffer (2.5 mL), MeOH (2 mL) and 30% aqueous  $\text{H}_2\text{O}_2$  (0.5 mL). The solution was stirred vigorously for 1 h and then warmed to ambient temperature where it was diluted with 50 mL  $\text{Et}_2\text{O}$  and 10 mL of dilute HCl. The aqueous layer was extracted with  $\text{Et}_2\text{O}$  (4 x 50 mL) and then the combined organic layers were washed with 30 mL of dilute  $\text{NaHCO}_3$  solution. Drying of the organic solution with anhydrous  $\text{MgSO}_4$  was followed by concentration and radial chromatography to afford the title compound 0.32 g (70%) and a minor stereoisomer 0.018 g as a foamy yellow solid. The selectivity was found to be 15:1 (anti/anti) via  $^1\text{H}$  NMR of the crude reaction material. TLC  $R_f = 0.69$  (50% EtOAc/hexanes);  $[\alpha]_D^{23} = -109.3^{\circ}$  ( $c$  0.80,  $\text{CHCl}_3$ )  $^1\text{H}$  NMR ( $\text{CDCl}_3$ , 500 MHz)  $\delta$  7.37 (s, 1H), 6.99 (d,  $J = 8.5$  Hz, 2H), 6.95 (d,  $J = 8.0$  Hz, 2H), 6.78 (d,  $J = 9.0$  Hz, 2H), 6.76 (d,  $J = 9.5$  Hz, 2H), 5.36 (d,  $J = 9.5$  Hz, 1H), 4.91 (d,  $J = 9.5$  Hz, 1H), 4.54 (d,  $J = 5.0$  Hz, 1H), 4.28-4.23 (m, 1H), 3.91 (s, 3H), 3.86 (s, 3H), 3.82 (s, 3H), 3.77 (s, 3H),

3.76 (s, 3H), 2.77 (br s, 1H), 2.68 (dd,  $J = 7.0, 12.5$  Hz, 1H), 2.64 (dd,  $J = 7.0, 12.0$  Hz, 1H), 2.15-2.07 (m, 1H), 1.72 (ddd,  $J = 4.5, 10.5, 13.7$  Hz, 1H), 1.64 (ddd,  $J = 3.0, 9.5, 13.9$  Hz, 1H), 0.95 (d,  $J = 6.0$  Hz, 3H);  $^{13}\text{C}$  NMR ( $\text{CDCl}_3$ , 125 MHz)  $\delta$  170.1, 160.3, 160.0, 153.0, 148.5, 148.0, 138.5, 131.0, 129.0, 128.7, 128.1, 126.8, 114.0, 107.3, 85.2, 78.3, 76.7, 71.4, 62.6, 61.1, 56.3, 55.4, 40.4, 32.6, 30.3, 19.4; HRMS (FAB+) found 634.2256  $[\text{M} + \text{Na}]^+$ , calcd 634.2265 for  $\text{C}_{32}\text{H}_{37}\text{NO}_{11}\text{Na}$ .

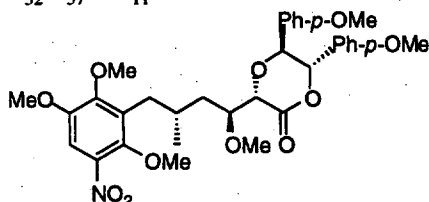

**(3S, 5S, 6S)-3-[(1S, 3R)-1-methoxy-3-methyl-4-(5-nitro-2,3,6-trimethoxy-phenyl)-butyl]-5,6-bis-(4-methoxy-phenyl)-[1,4]dioxan-2-one.** A flame-dried 25 mL round bottom flask was charged with aldol adduct **12** (0.280 g, 0.458 mmol) and 6 mL of dry  $\text{CH}_2\text{Cl}_2$ . The solution was cooled to  $0^\circ\text{C}$  under nitrogen atmosphere and proton sponge (0.196 g, 0.916 mmol) was added followed by  $\text{Me}_3\text{OBF}_4$  (0.135 g, 0.916 mmol). The resulting heterogeneous light brown solution was then allowed to slowly warm to ambient temperature and was stirred for 8 h. The mixture was then filtered directly over a silica plug eluting with 50% EtOAc/hexanes and concentrated. Radial chromatography (20% EtOAc/hexanes) afforded the title compound, 0.260 g (91%), as a yellow foamy solid. TLC  $R_f = 0.73$  (50% EtOAc/hexanes);  $[\alpha]_D^{23} = -142.7^\circ$  ( $c$  1.0,  $\text{CHCl}_3$ );  $^1\text{H}$  NMR ( $\text{CDCl}_3$ , 300 MHz)  $\delta$  7.36 (s, 1H), 7.01 (d,  $J = 8.7$  Hz, 2H), 6.98 (d,  $J = 8.7$  Hz, 2H), 6.78 (d,  $J = 8.7$  Hz, 2H), 6.74 (d,  $J = 8.9$  Hz, 2H), 5.37 (d,  $J = 8.7$  Hz, 1H), 4.98 (d,  $J = 8.7$  Hz, 1H), 4.88 (d,  $J = 2.1$  Hz, 1H), 3.95-3.88 (m, 1H), 3.91 (s, 3H), 3.85 (s, 6H), 3.77 (s, 3H), 3.75 (s, 3H), 3.44 (s, 3H), 2.70-2.59 (m, 2H), 2.11-1.98 (m, 1H), 1.90 (ddd,  $J = 5.0, 9.0, 13.8$  Hz, 1H), 1.56 (ddd,  $J = 4.80, 9.0, 13.5$  Hz, 1H), 0.96 (d,  $J = 6.6$  Hz, 3H);  $^{13}\text{C}$  NMR ( $\text{CDCl}_3$ , 75 MHz)  $\delta$  168.2, 160.0, 159.8, 153.8, 152.9, 148.5, 148.0, 138.4, 130.9, 128.9, 128.2, 127.4, 113.9, 107.2, 85.7, 82.8, 77.9, 74.3, 62.6, 61.0, 57.7, 56.2, 55.4, 38.0, 32.3, 30.6, 19.9; HRMS (FAB+) found 648.2424  $[\text{M} + \text{Na}]^+$ , calcd 648.2421 for  $\text{C}_{33}\text{H}_{39}\text{NO}_{11}\text{Na}$ .

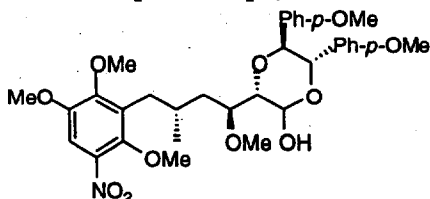

**(3S, 5S, 6S)-3-[(1S, 3R)-1-methoxy-3-methyl-4-(5-nitro-2,3,6-trimethoxy-phenyl)-butyl]-5,6-bis-(4-methoxy-phenyl)-[1,4]dioxan-2-ol (13).** A flame-dried 100 mL round bottom flask was charged with adduct **12** (0.304 g, 0.486 mmol) and 15 mL of dry toluene. The solution was cooled to  $-78^\circ\text{C}$  under a nitrogen atmosphere and DIBAL (1.3 mL, 1.5 M toluene) was added dropwise over 15 min. The resulting red-orange solution was then allowed to stir at  $-78^\circ\text{C}$  for an additional 25 min before being quenched, at the same temperature, by the addition of 0.5 mL pH 7 buffer solution and 0.5 mL of MeOH. The solution turned bright yellow and was allowed to warm to ambient temperature. Then anhydrous  $\text{MgSO}_4$  was added and the solution was vigorously stirred for 20 min. The crude solution was then filtered over celite and anhydrous  $\text{Na}_2\text{SO}_4$  plug eluting with EtOAc. The residue was then concentrated and then purified via radial chromatography (gradient 20-30% EtOAc/hexanes) to afford the title compound, 0.255 g (84%) (9:1 mixture of anomers; from  $^1\text{H}$  NMR), as a light yellow foamy solid. TLC  $R_f = 0.13$  (30%

EtOAc/hexanes); Major anomer  $^1\text{H}$  NMR ( $\text{CDCl}_3$ , 500 MHz)  $\delta$  7.16 (s, 1H), 6.91 (d,  $J$  = 9.0 Hz, 2H), 6.84 (d,  $J$  = 9.0 Hz, 2H), 6.71 (d,  $J$  = 9.0 Hz, 2H), 6.68 (d,  $J$  = 9.0 Hz, 2H), 5.39 (d,  $J$  = 5.0 Hz, 1H), 4.94 (d,  $J$  = 10.0 Hz, 1H), 4.32 (d,  $J$  = 9.0 Hz, 1H), 4.06-4.02 (m, 1H), 3.84 (s, 3H), 3.80 (s, 3H), 3.78 (s, 3H), 3.74 (s, 6H), 3.50-3.46 (m, 1H), 3.47 (s, 3H), 3.11 (d,  $J$  = 4.5 Hz, 1H), 2.56 (d,  $J$  = 7.0 Hz, 2H), 2.14-2.10 (m, 1H), 1.68 (ddd,  $J$  = 2.0, 10.0, 15.0 Hz, 1H), 1.54 (ddd,  $J$  = 2.5, 7.0, 15.0 Hz, 1H), 1.04 (d,  $J$  = 6.5 Hz, 3H); HRMS (FAB $^+$ ) found 650.2575  $[\text{M} + \text{Na}]^+$ , calcd 650.2578 for  $\text{C}_{33}\text{H}_{41}\text{NO}_{11}\text{Na}$ .

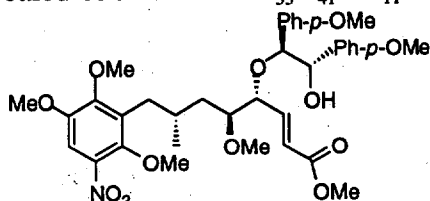

**(2E, 4R, 5S, 7R)-4-[(1S, 2S)-2-Hydroxy-1,2-bis-(4-methoxy-phenyl)-ethoxy]-5-methoxy-7-methyl-8-(5-nitro-2,3,6-trimethoxy-phenyl)-oct-2-enoic acid methyl ester (14).** A 50 mL round bottom flask was charged with lactol 13 (0.205 g, 0.327 mmol), 10 mL of dry  $\text{CH}_3\text{CN}$ , dry LiCl (0.027 g, 0.653 mmol), and methyl (triphenylphosphoranylidene) acetate (0.218 g, 0.653 mmol) was added portions. The resulting solution was heated at reflux under nitrogen atmosphere for 3.5 h at which time the solution was concentrated in vacuo. The crude residue was dissolved in  $\text{CH}_2\text{Cl}_2$  and filtered directly over a silica gel plug (eluting with 50% EtOAc/hexanes). The residue was then purified via radial chromatography (30% EtOAc/hexanes) to afford the title compound, 0.207 g (93%) (>19:1, E/Z; from  $^1\text{H}$  NMR), as a light yellow foamy solid. TLC  $R_f$  = 0.57 (45% EtOAc/hexanes);  $[\alpha]_D^{20}$  =  $-75.8^\circ$  ( $c$  1.1,  $\text{CHCl}_3$ );  $^1\text{H}$  NMR ( $\text{CDCl}_3$ , 300 MHz) 7.40 (s, 1H), 6.93 (d,  $J$  = 9.0 Hz, 2H), 6.88 (d,  $J$  = 8.4 Hz, 2H), 6.75-6.68 (m, 1H), 6.70 (d,  $J$  = 8.4 Hz, 2H), 6.70 (d,  $J$  = 8.7 Hz, 2H), 5.91 (dd,  $J$  = 1.8, 15.6 Hz, 1H), 4.66 (d,  $J$  = 8.7 Hz, 1H), 4.38 (d,  $J$  = 8.4 Hz, 1H), 4.39-4.35 (m, 1H), 4.02 (d,  $J$  = 1.2 Hz, 1H), 3.92 (s, 3H), 3.89 (s, 3H), 3.85 (s, 3H), 3.75 (s, 3H), 3.74 (s, 3H), 3.69 (s, 3H), 3.40 (s, 3H), 3.46-3.40 (m, 1H), 2.70 (dd,  $J$  = 5.7, 12.6 Hz, 1H), 2.57 (d,  $J$  = 8.7, 12.9 Hz, 1H), 2.10-1.97 (m, 1H), 1.80 (ddd,  $J$  = 4.2, 9.9, 14.7 Hz, 1H), 1.27-1.18 (m, 1H), 0.81 (d,  $J$  = 6.6 Hz, 3H);  $^{13}\text{C}$  NMR ( $\text{CDCl}_3$ , 75 MHz)  $\delta$  166.6, 159.4, 159.1, 152.9, 148.5, 148.0, 145.6, 138.4, 131.7, 131.0, 130.3, 129.0, 128.6, 122.2, 113.6, 113.4, 107.2, 88.0, 82.1, 78.9, 78.5, 62.6, 61.1, 58.3, 56.3, 55.3, 51.8, 37.2, 32.5, 30.6, 19.4; HRMS (FAB $^+$ ) found 706.2831  $[\text{M} + \text{Na}]^+$ , calcd 706.2840 for  $\text{C}_{36}\text{H}_{45}\text{NO}_{12}\text{Na}$ .

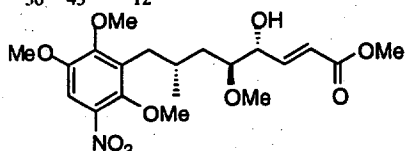

**(4R, 5S, 7R)-4-Hydroxy-5-methoxy-7-methyl-8-(5-nitro-2,3,6-trimethoxy-phenyl)-oct-2-enoic acid methyl ester.** A 25 mL round bottom flask was charged with enoate 14 (0.190 g, 0.278 mmol), 5 mL  $\text{CH}_3\text{CN}/\text{H}_2\text{O}$  9:1 and cooled to  $0^\circ\text{C}$ . To the solution was added in portion ceric ammonium nitrate (0.381 g, 0.695 mmol). The resulting orange-yellow solution was stirred for 0.5 h at which time it was diluted with 10 mL  $\text{Et}_2\text{O}$  and 10 mL  $\text{H}_2\text{O}$ . The layers were separated and the aqueous layer was extracted further with  $\text{Et}_2\text{O}$  (4 x 10 mL). The combined organic layers were then dried over anhydrous  $\text{MgSO}_4$  and concentrated in vacuo. The residue was then purified via radial chromatography (30-50% EtOAc/hexanes) to afford the title compound, 0.111 g (93%), as a viscous yellow oil. TLC  $R_f$  = 0.16 (30% EtOAc/hexanes);

$[\alpha]_D^{23} = -7.20^\circ$  ( $c$  1.5,  $\text{CHCl}_3$ );  $^1\text{H}$  NMR ( $\text{CDCl}_3$ , 300 MHz)  $\delta$  7.39 (s, 1H), 6.91 (dd,  $J = 4.5$ , 15.6 Hz, 1H), 6.15 (dd,  $J = 1.8$ , 15.6 Hz, 1H), 4.60–4.55 (m, 1H), 3.91 (s, 3H), 3.89 (s, 3H), 3.83 (s, 3H), 3.76 (s, 3H), 3.44–3.36 (m, 1H), 3.41 (s, 3H), 2.66 (dd,  $J = 6.0$ , 12.6 Hz, 1H), 2.56 (dd,  $J = 3.6$ , 12.3 Hz, 1H), 2.08–1.94 (m, 1H), 1.63 (ddd,  $J = 4.5$ , 9.6, 14.4 Hz, 1H), 1.17 (ddd,  $J = 3.6$ , 9.3, 14.4 Hz, 1H), 1.14 (d,  $J = 3.6$  Hz, 1H), 0.83 (d,  $J = 6.6$  Hz, 3H);  $^{13}\text{C}$  NMR ( $\text{CDCl}_3$ , 75 MHz)  $\delta$  166.9, 152.8, 148.4, 147.9, 146.2, 138.3, 130.9, 121.4, 107.1, 81.5, 70.9, 62.5, 61.0, 57.9, 56.2, 51.7, 36.5, 32.3, 30.2, 19.3; HRMS (FAB $^+$ ) found 450.1740  $[\text{M} + \text{Na}]^+$ , calcd 450.1740 for  $\text{C}_{20}\text{H}_{29}\text{NO}_9\text{Na}$ .

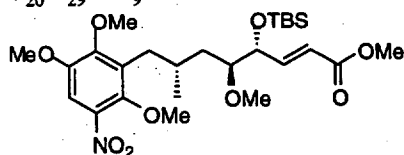

**(4R, 5S, 7R)-4-(tert-Butyl-dimethyl-silanyloxy)-5-methoxy-7-methyl-8-(5-nitro-2,3,6-trimethoxy-phenyl)-oct-2-enoic acid methyl ester (2).** A 10 mL round bottom flask was charged with the preceding hydroxy-ester (0.110 g, 0.257 mmol) and 3 mL of dry  $\text{CH}_2\text{Cl}_2$ . The solution was stirred under a nitrogen atmosphere at ambient temperature and imidazole (0.070 g, 1.03 mmol) was added followed by TBSCl (0.078 g, 0.515 mmol). The resulting solution was stirred for 40 h at which time imidazole (0.017 g, 0.257 mmol) and TBSCl (0.039 g, 0.257 mmol) were again added. Stirring was continued for 8 h at which the solution was diluted with 10 mL  $\text{CH}_2\text{Cl}_2$  and washed with 10 mL saturated  $\text{NH}_4\text{Cl}$  solution. The aqueous layer was extracted further with  $\text{CH}_2\text{Cl}_2$  (3 x 10 mL). The combined organic layers were then dried over anhydrous  $\text{MgSO}_4$  and concentrated. Radial chromatography (gradient 5–10% EtOAc/hexanes) afforded the title compound, 0.127 g (91%), as a viscous yellow oil. TLC  $R_f$  = 0.26 (10% EtOAc/hexanes);  $[\alpha]_D^{23} = -22.0^\circ$  ( $c$  2.0,  $\text{CHCl}_3$ );  $^1\text{H}$  NMR ( $\text{CDCl}_3$ , 300 MHz)  $\delta$  7.36 (s, 1H), 6.93 (dd,  $J = 4.5$ , 15.6 Hz, 1H), 6.04 (dd,  $J = 1.8$ , 15.6 Hz, 1H), 4.36–4.33 (m, 1H), 3.89 (s, 3H), 3.86 (s, 3H), 3.80 (s, 3H), 3.73 (s, 3H), 3.35 (s, 3H), 3.21 (dt,  $J = 2.7$ , 10.5 Hz, 1H), 2.62 (dd,  $J = 6.6$ , 12.9 Hz, 1H), 2.54 (dd,  $J = 8.1$ , 12.9 Hz, 1H), 2.06–1.92 (m, 1H), 1.51 (ddd,  $J = 3.9$ , 10.5, 14.4 Hz, 1H), 1.15 (ddd,  $J = 2.4$ , 9.9, 14.1 Hz, 1H), 0.87 (s, 9H), 0.82 (d,  $J = 6.6$  Hz, 3H), 0.01 (s, 3H), -0.01 (s, 3H);  $^{13}\text{C}$  NMR ( $\text{CDCl}_3$ , 75 MHz)  $\delta$  167.0, 152.9, 148.5, 148.4, 148.0, 138.3, 131.1, 121.2, 107.0, 82.8, 73.9, 62.4, 61.0, 58.8, 56.2, 51.7, 37.7, 32.6, 30.2, 25.9, 19.5, 18.3, -4.7, -4.8; HRMS (FAB $^+$ ) found 564.2623  $[\text{M} + \text{Na}]^+$ , calcd 564.2605 for  $\text{C}_{26}\text{H}_{43}\text{NO}_9\text{SiNa}$ .

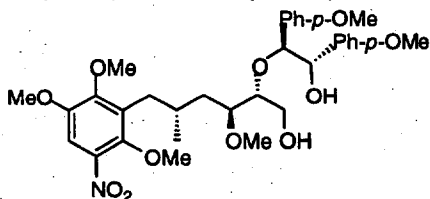

**(2R, 3S, 5R)-2-[(1S, 2S)-2-Hydroxy-1,2-bis-(4-methoxy-phenyl)-ethoxy]-3-methoxy-5-methyl-6-(5-nitro-2,3,6-trimethoxy-phenyl)-hexan-1-ol.** A 50 mL round bottom flask was charged with aldol adduct **12** (0.260 g, 0.415 mmol), 8 mL of THF and 0.05 mL of MeOH. The solution was cooled to  $0^\circ\text{C}$  under a nitrogen atmosphere and  $\text{LiBH}_4$  (0.014 g; 0.620 mmol) was added. The resulting solution was allowed to slowly warm to ambient temperature and stir for 4 h at which time the solution was diluted with 20 mL  $\text{Et}_2\text{O}$  and quenched with 1 mL of saturated  $\text{NH}_4\text{Cl}$  solution. An additional 10 mL of  $\text{NH}_4\text{Cl}$  solution was added and the aqueous layer was further extracted with  $\text{Et}_2\text{O}$  (4 x 20 mL). The organic layers were combined and dried over anhydrous  $\text{MgSO}_4$  concentration and radial chromatography afforded the title compound 0.260 g



(99%), as a light yellow foamy solid. TLC  $R_f$  = 0.23 (50% EtOAc / hexanes);  $[\alpha]_D^{23}$  =  $-9.7^\circ$  ( $c$  0.70,  $\text{CHCl}_3$ )  $^1\text{H}$  NMR ( $\text{CDCl}_3$ , 300 MHz)  $\delta$  7.41 (s, 1H), 6.95 (d,  $J$  = 8.7 Hz, 2H), 6.94 (d,  $J$  = 8.7 Hz, 2H), 6.74 (d,  $J$  = 8.7 Hz, 2H), 6.70 (d,  $J$  = 8.9 Hz, 2H), 4.65 (d,  $J$  = 8.7 Hz, 1H), 4.32 (d,  $J$  = 8.7 Hz, 1H), 4.24 (m, 1H), 3.92 (s, 3H), 3.89 (s, 3H), 3.84 (s, 3H), 3.76 (s, 3H), 3.75-3.69 (m, 1H), 3.74 (s, 3H), 3.59-3.51 (m, 1H), 3.51-3.41 (m, 2H), 3.43 (s, 3H), 2.71 (dd,  $J$  = 6.0, 12.6 Hz, 1H), 2.60 (dd,  $J$  = 8.7, 12.6 Hz, 1H), 2.11-1.98 (m, 1H), 1.82 (ddd,  $J$  = 5.0, 9.3, 14.1 Hz, 1H), 1.72-1.62 (m, 1H), 1.45-1.25 (m, 1H), 0.86 (d,  $J$  = 6.9 Hz, 3H);  $^{13}\text{C}$  NMR ( $\text{CDCl}_3$ , 75 MHz)  $\delta$  159.4, 159.0, 152.8, 148.5, 147.9, 138.4, 131.8, 131.0, 130.9, 128.9, 128.5, 113.8, 113.3, 107.1, 88.2, 80.3, 80.0, 78.6, 62.8, 62.5, 61.0, 58.1, 56.2, 55.2, 37.8, 32.4, 30.6, 19.5; HRMS (FAB $^+$ ) found 652.2728  $[\text{M} + \text{Na}]^+$ , calcd 652.2734 for  $\text{C}_{33}\text{H}_{43}\text{NO}_{11}\text{Na}$ .

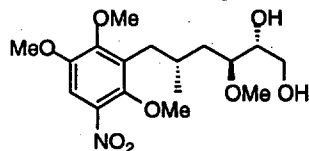

**(2R, 3S, 5R)-3-Methoxy-5-methyl-6-(5-nitro-2,3,6-trimethoxy-phenyl)-hexan-1,2-diol (17).**

A 10 mL round bottom flask was charged with the preceding diol (0.091 g, 0.144 mmol) and  $\text{CH}_3\text{CN} / \text{H}_2\text{O}$  (10:1, 2 mL). The solution was cooled to  $0^\circ\text{C}$  and ceric ammonium nitrate (0.198 g, 0.361 mmol) was added in portion over 3 min. The resulting light orange-yellow solution was then stirred at  $0^\circ\text{C}$  for 30 min and diluted with 5 mL of  $\text{Et}_2\text{O}$  and 5 mL of  $\text{H}_2\text{O}$ . The layers were separated and the aqueous phase was extracted further with  $\text{Et}_2\text{O}$  (4 x 5 mL). The combined organic layers were dried over anhydrous  $\text{MgSO}_4$ . Concentration followed by radial chromatography provided the title compound 0.041 g (80%) as a viscous yellow oil. TLC  $R_f$  = 0.16 (50% EtOAc/hexanes);  $[\alpha]_D^{25}$  =  $-17.6^\circ$  ( $c$  0.5,  $\text{CHCl}_3$ )  $^1\text{H}$  NMR ( $\text{CDCl}_3$ , 300 MHz)  $\delta$  7.40 (s, 1H), 3.92 (s, 3H), 3.90 (s, 3H), 3.84 (s, 3H), 3.68-3.56 (m, 1H), 3.59-3.15 (m, 2H), 3.45-3.38 (m, 1H), 3.40 (s, 3H), 2.96 (bs, 1H), 2.76 (bs, 1H), 2.67 (dd,  $J$  = 6.3, 12.6 Hz, 1H), 2.57 (dd,  $J$  = 8.4, 12.9 Hz, 1H), 2.07-1.97 (m, 1H), 1.62 (ddd,  $J$  = 4.8, 8.7, 13.8 Hz, 1H), 1.30 (ddd,  $J$  = 3.9, 9.0, 13.2 Hz, 1H), 0.88 (d,  $J$  = 6.9 Hz, 3H);  $^{13}\text{C}$  NMR ( $\text{CDCl}_3$ , 75 MHz)  $\delta$  152.8, 148.5, 147.9, 138.4, 130.9, 107.1, 81.3, 72.8, 63.5, 62.5, 61.0, 58.5, 56.3, 37.9, 32.3, 30.4, 19.8; HRMS (FAB $^+$ ) found 396.1652  $[\text{M} + \text{Na}]^+$ , calcd 396.1635 for  $\text{C}_{17}\text{H}_{27}\text{NO}_8\text{Na}$ .

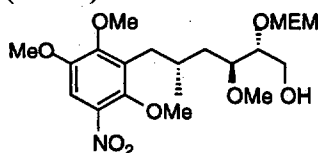

**(2R, 3S, 5R)-3-Methoxy-2-(2-methoxy-ethoxymethoxy)-5-methyl-6-(5-nitro-2,3,6-trimethoxy-phenyl)-hexan-1-ol (18).** A 5 mL round bottom flask was charged with diol 17 (0.043 g, 0.115 mmol), 1 mL of dry  $\text{CH}_2\text{Cl}_2$ ,  $i\text{Pr}_2\text{NEt}$  (0.1 mL), 4-DMAP (0.003 g, 0.0231 mmol) and TBSCl (0.19 g, 0.127 mmol). The resulting solution was stirred under a nitrogen atmosphere for 24 h and then an additional 0.019 g of TBSCl was added and stirring continued for 8 h. Then 0.1 mL of  $i\text{Pr}_2\text{NEt}$  was added followed by MEMCl (0.053 mL, 0.461 mmol) and the solution was allowed to stir for 10 h at which time it was diluted with 10 mL  $\text{CH}_2\text{Cl}_2$  and 10 mL  $\text{H}_2\text{O}$ . The layers were separated and the aqueous phase was extracted further with  $\text{CH}_2\text{Cl}_2$  (3 x 10 mL). The combined organic extracts were dried over anhydrous  $\text{MgSO}_4$  and concentrated. The crude material was then taken up in 1 mL THF and treated with a TBAF solution (0.5 mL, 1.0 M THF). The resulting solution was allowed to stir for 3 h and then it was diluted with 10 mL of  $\text{Et}_2\text{O}$  and 10 mL of  $\text{H}_2\text{O}$ . The layers were separated and then the aqueous layer was

further extracted with Et<sub>2</sub>O (4 x 10 mL). The combined organic layers were dried over anhydrous MgSO<sub>4</sub> and concentrated. Radial chromatography afforded the title compound 0.041 g (77%). TLC  $R_f$  = 0.19 (50% EtOAc/hexanes);  $[\alpha]_D^{23}$  = +11.2° (c 1.3, CHCl<sub>3</sub>) <sup>1</sup>H NMR (CDCl<sub>3</sub>, 300 MHz)  $\delta$  7.38 (s, 1H), 4.81 (ABq,  $J$  = 7.2 Hz, 2H), 3.91 (s, 3H), 3.89 (s, 3H), 3.88-3.81 (m, 1H), 3.83 (s, 3H), 3.72-3.65 (m, 3H), 3.64-3.61 (m, 1H), 3.59-3.56 (m, 2H), 3.43-3.33 (m, 2H), 3.40 (s, 3H), 3.39 (s, 3H), 2.67 (dd,  $J$  = 6.3, 12.6 Hz, 1H), 2.56 (dd,  $J$  = 8.4, 12.6 Hz, 1H), 2.10-1.96 (m, 1H), 1.61 (ddd,  $J$  = 4.5, 9.6, 13.8 Hz, 1H), 1.29 (ddd,  $J$  = 3.3, 9.5, 13.3 Hz, 1H), 0.86 (d,  $J$  = 6.6 Hz, 3H); <sup>13</sup>C NMR (CDCl<sub>3</sub>, 75 MHz)  $\delta$  152.9, 148.5, 148.0, 138.4, 131.1, 107.1, 96.3, 83.3, 80.1, 71.8, 67.6, 62.7, 62.5, 61.0, 59.2, 58.6, 56.3, 38.8, 32.6, 30.4, 19.6; HRMS (FAB<sup>+</sup>) found 484.2166 [M+ Na<sup>+</sup>]<sup>+</sup>, calcd 484.2159 for C<sub>21</sub>H<sub>35</sub>NO<sub>10</sub>Na.

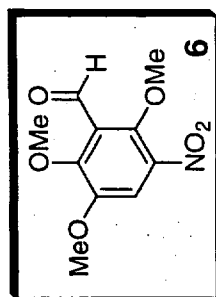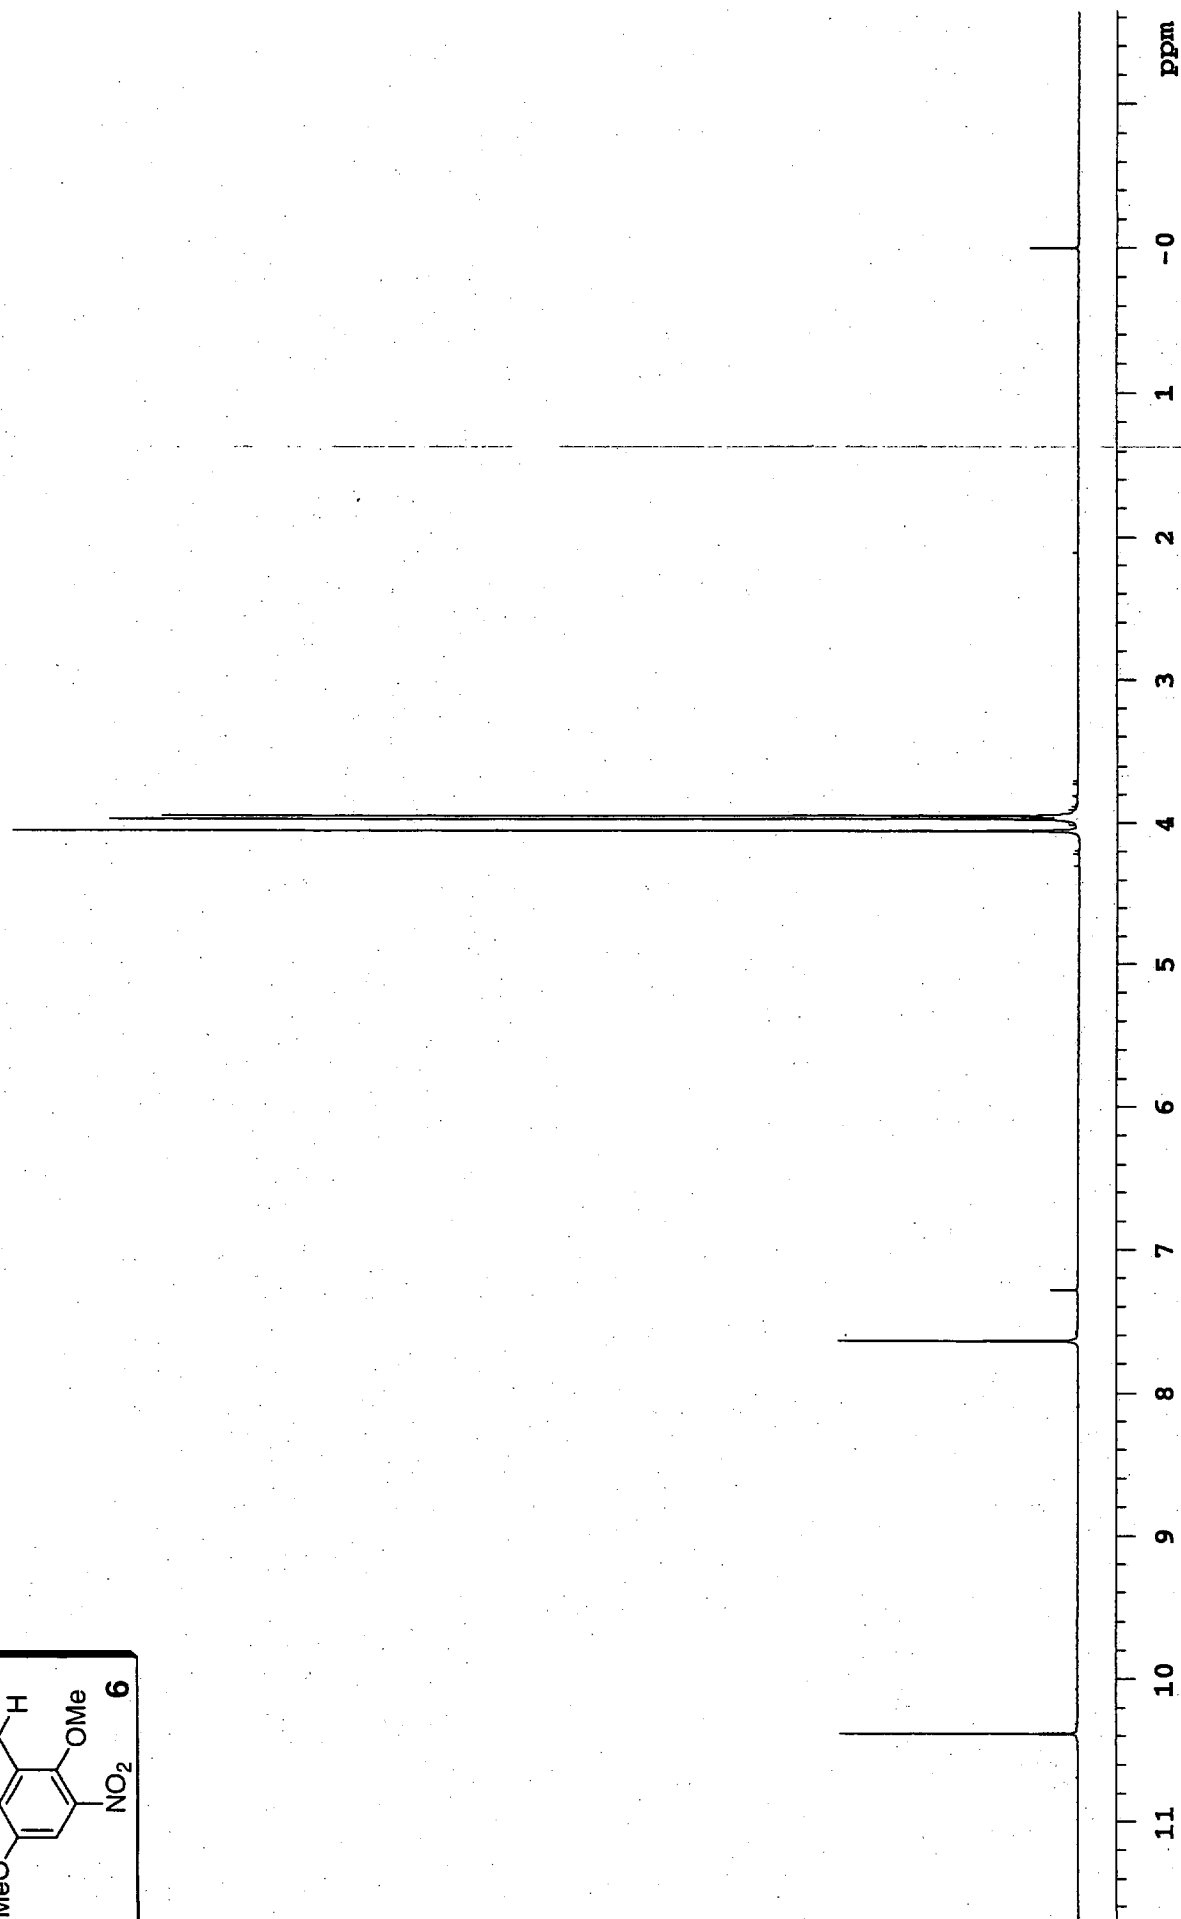

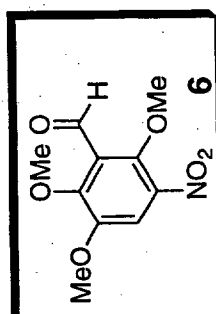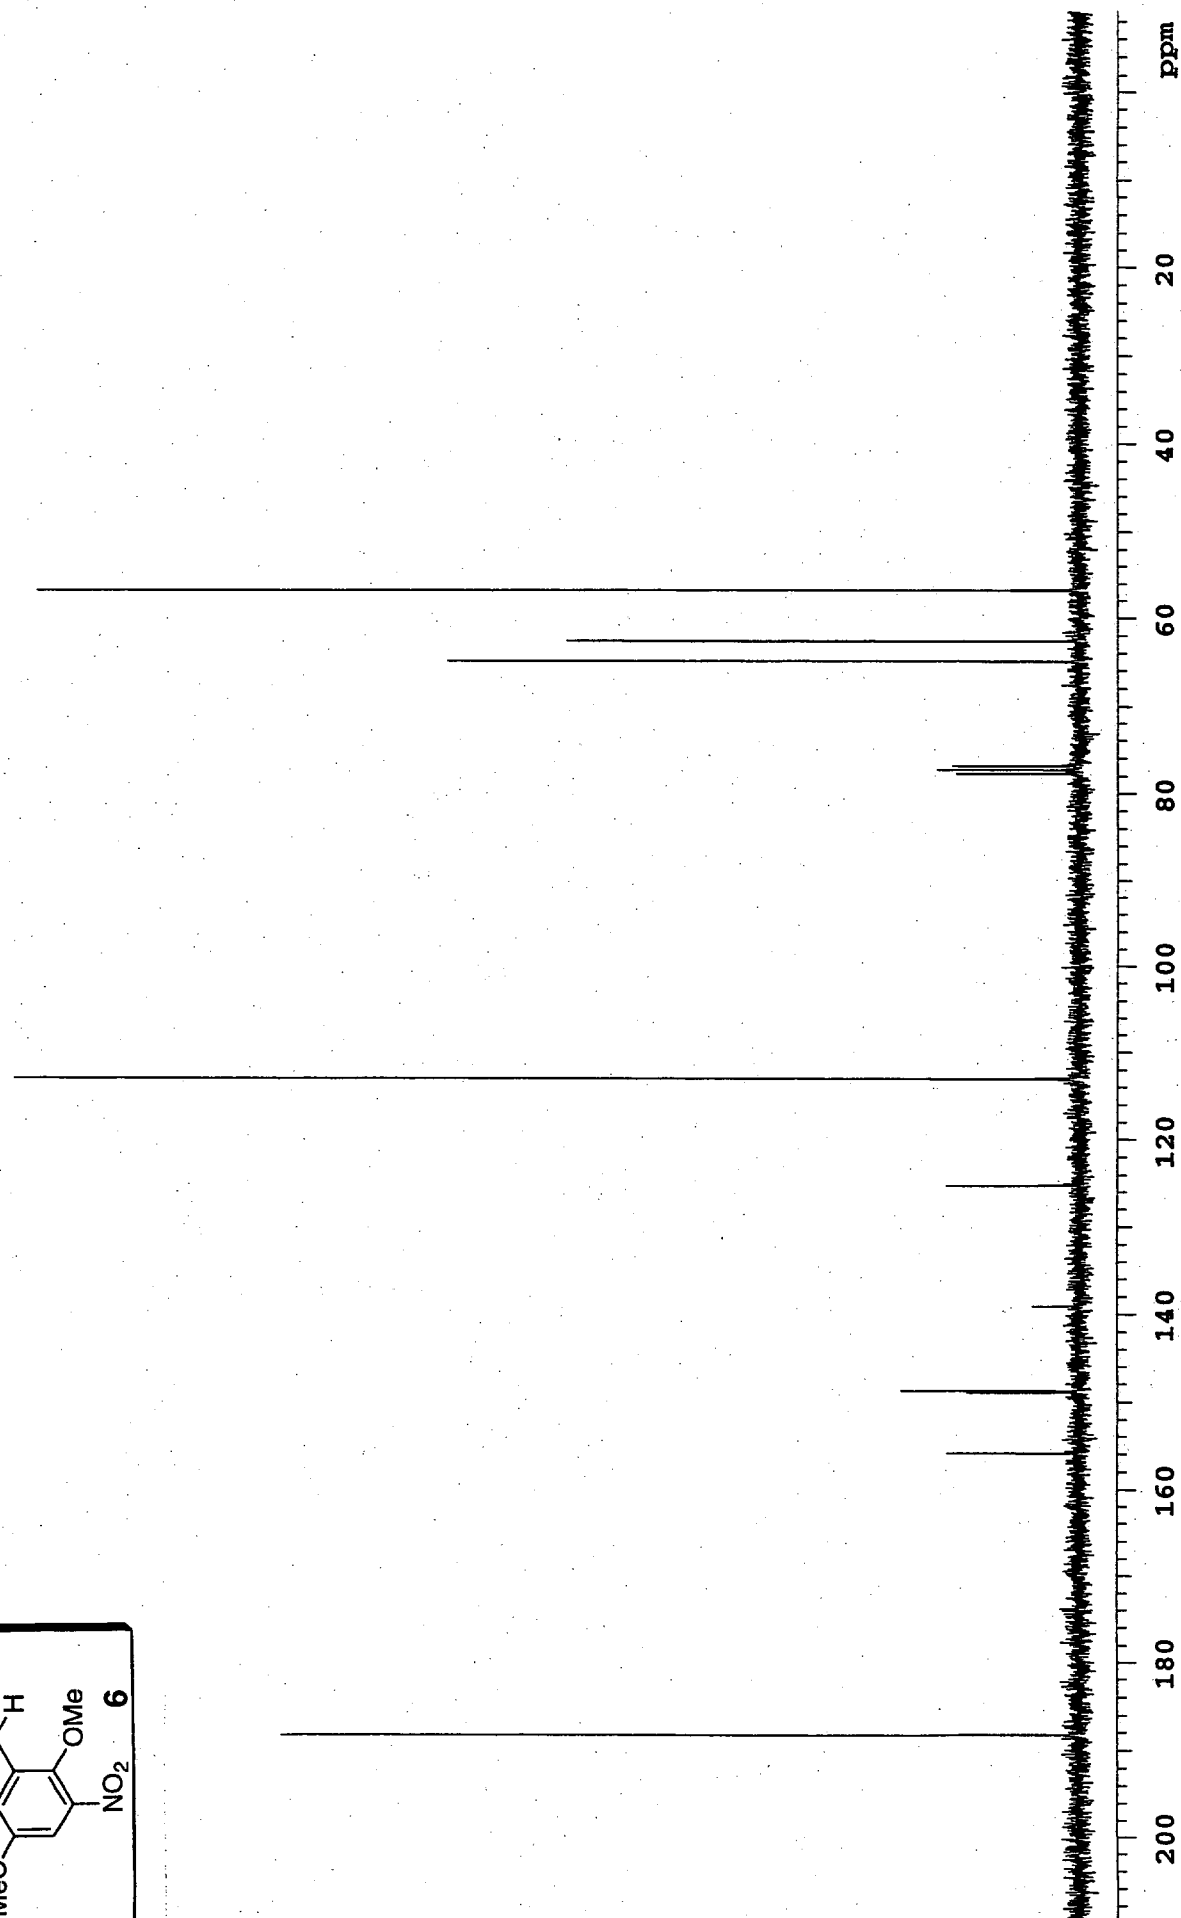

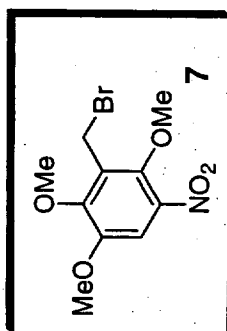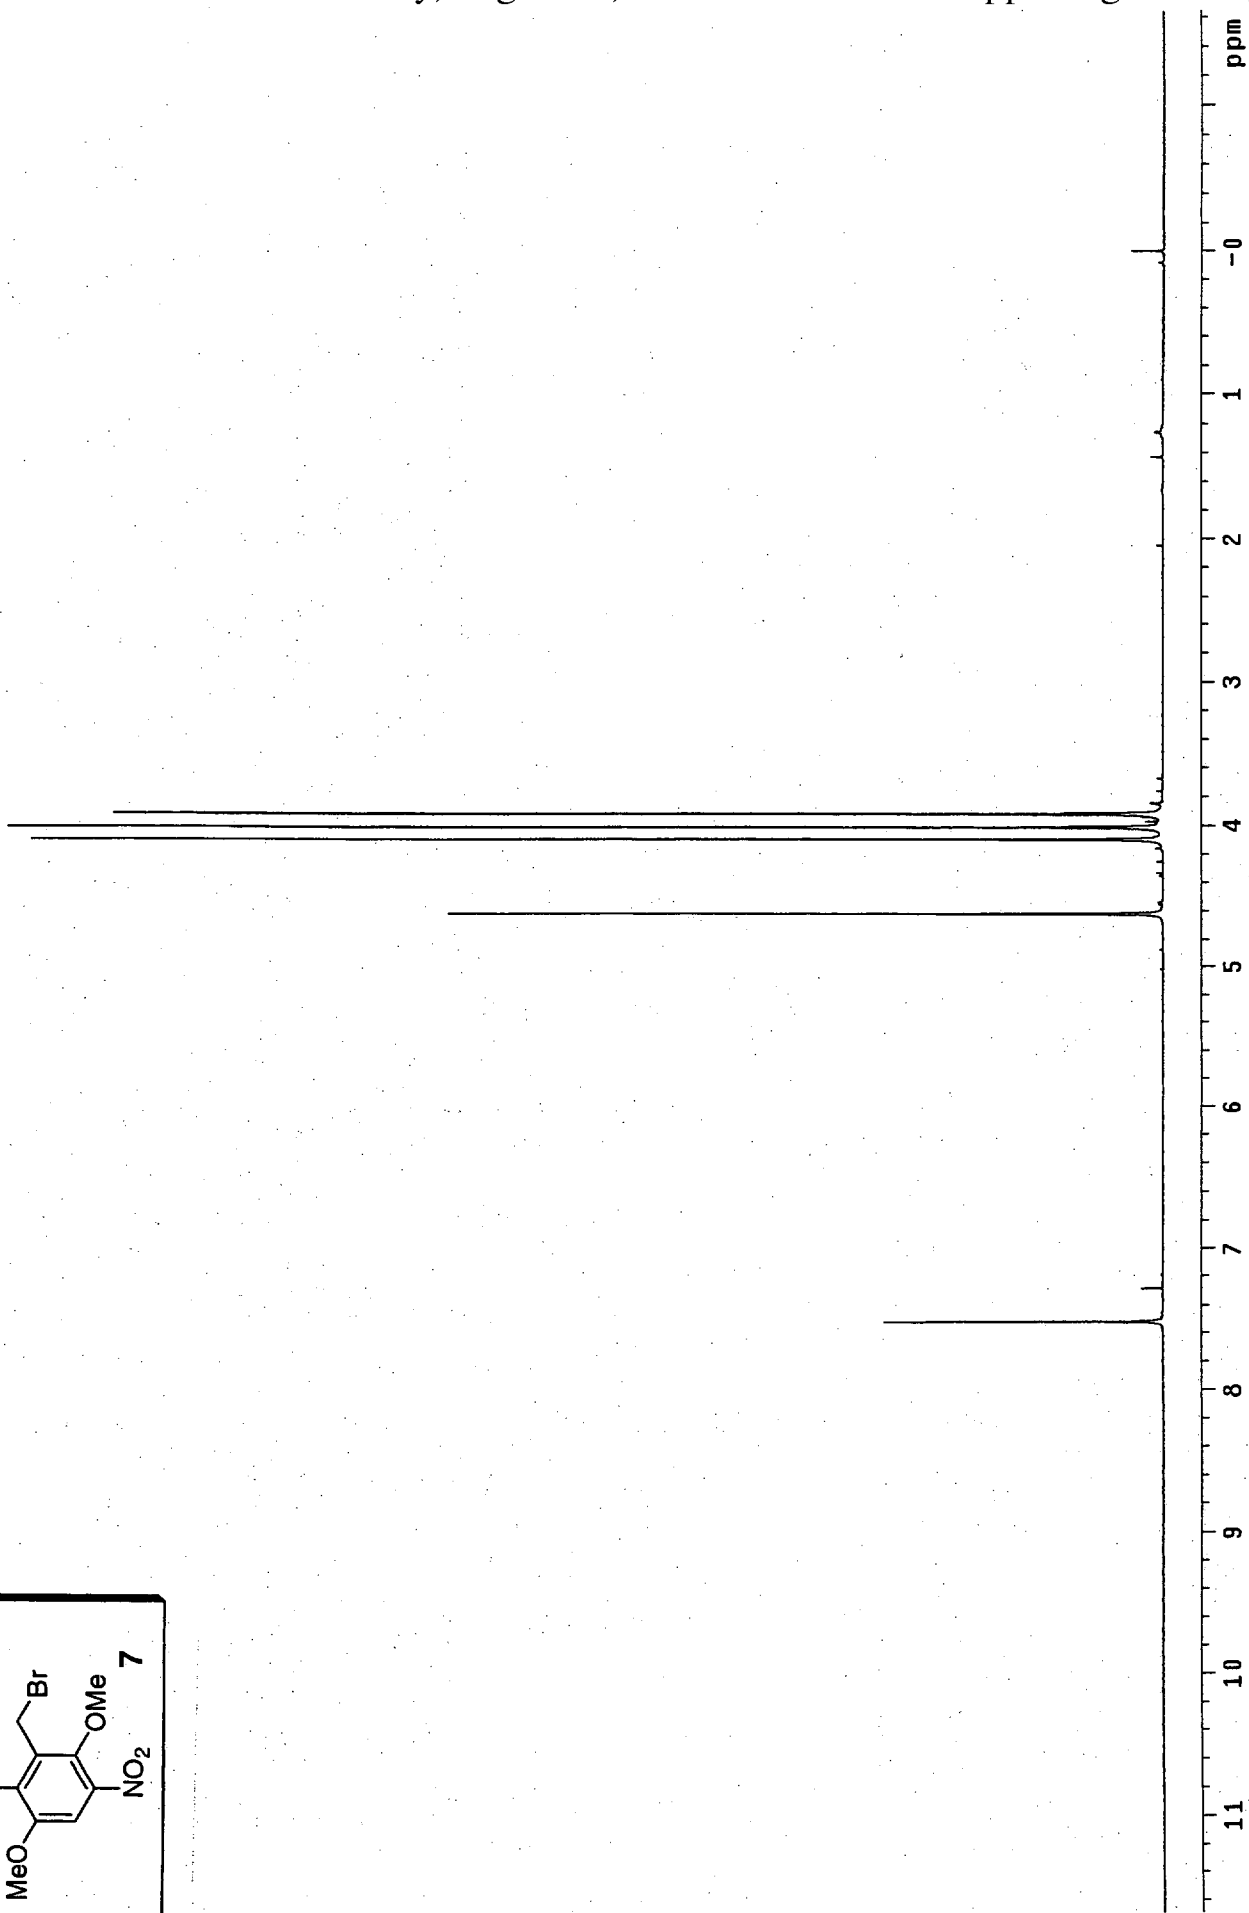

514

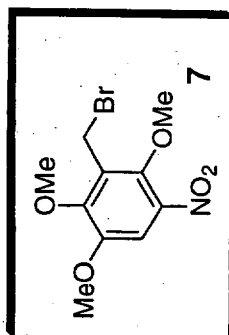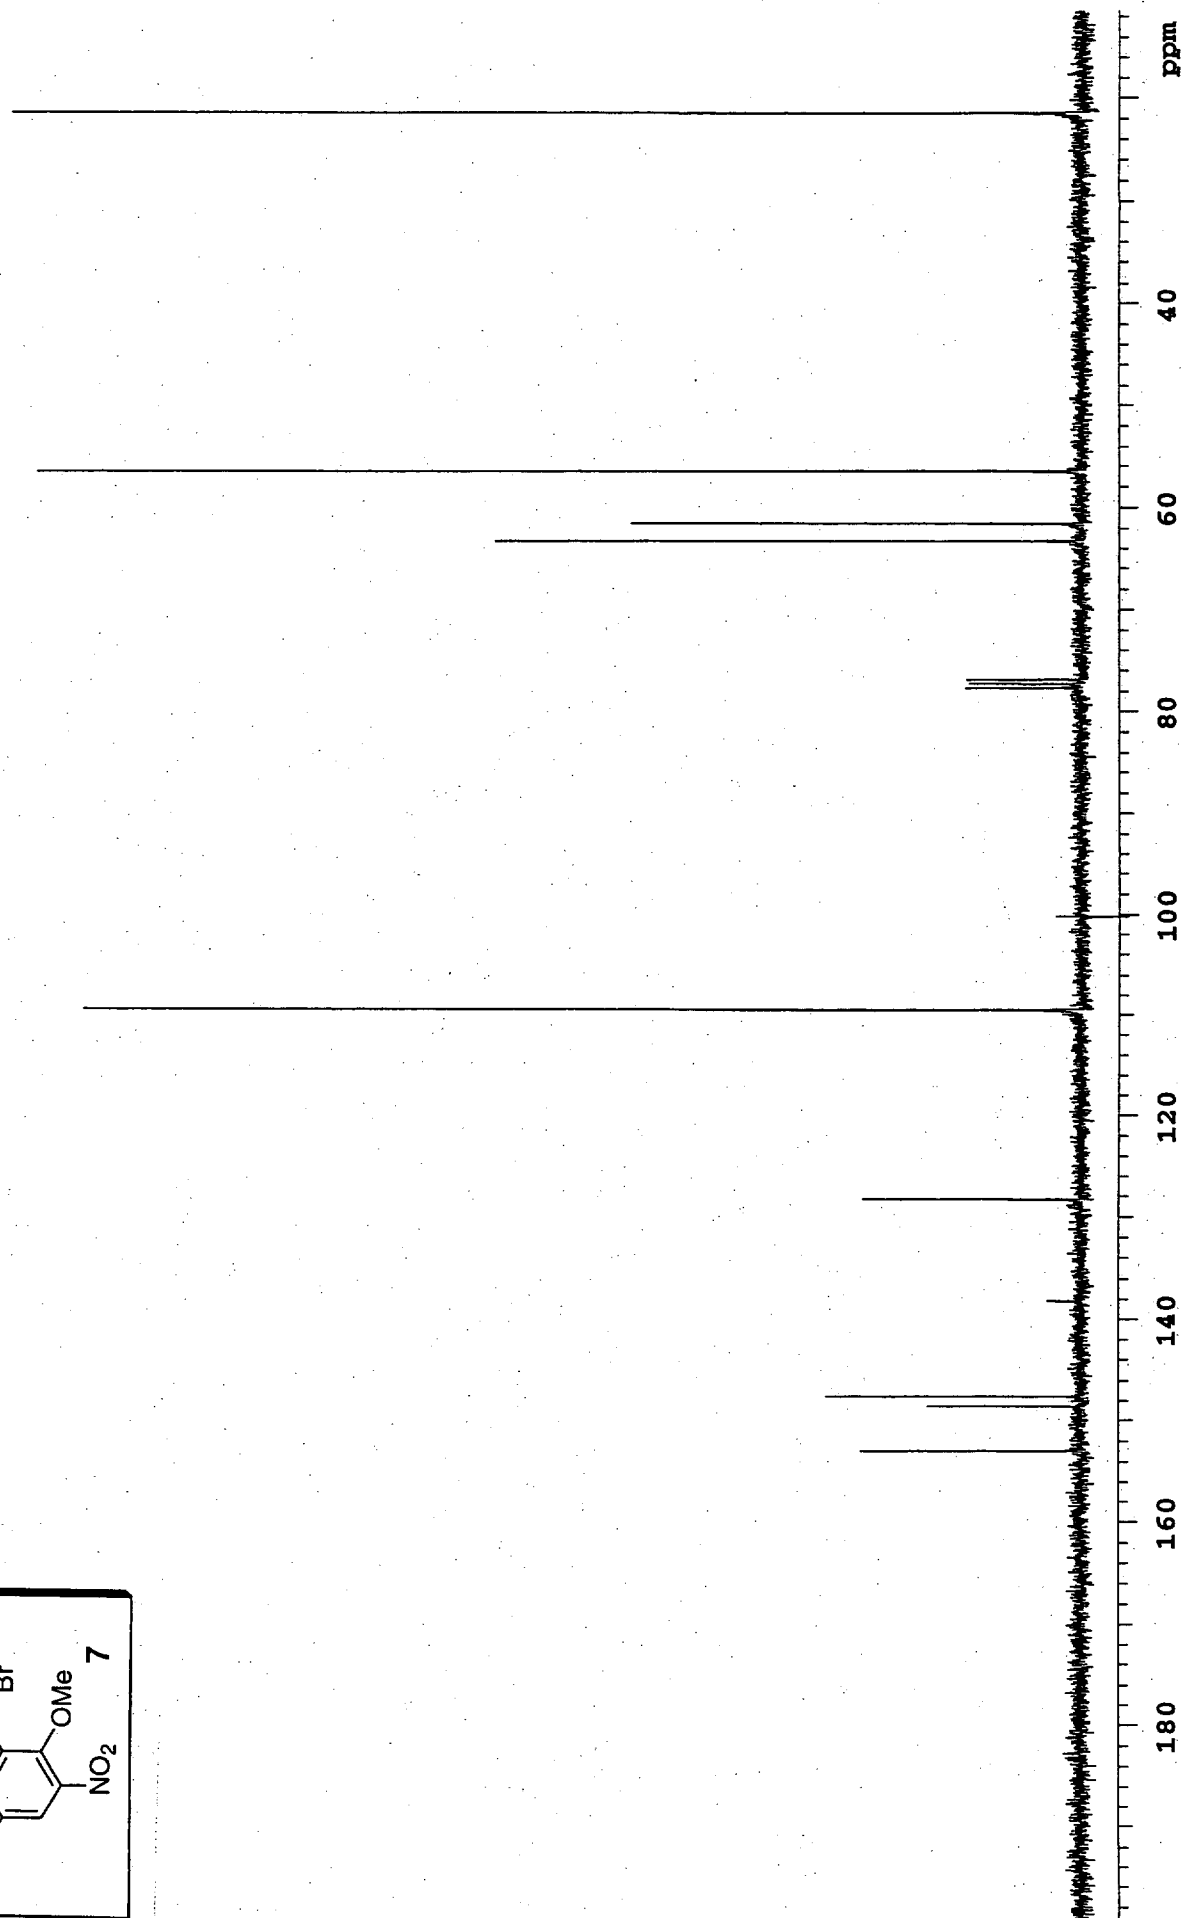

515

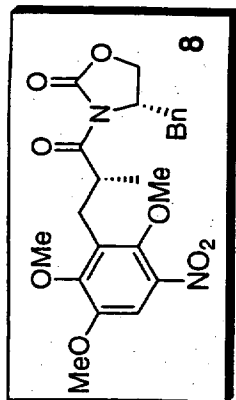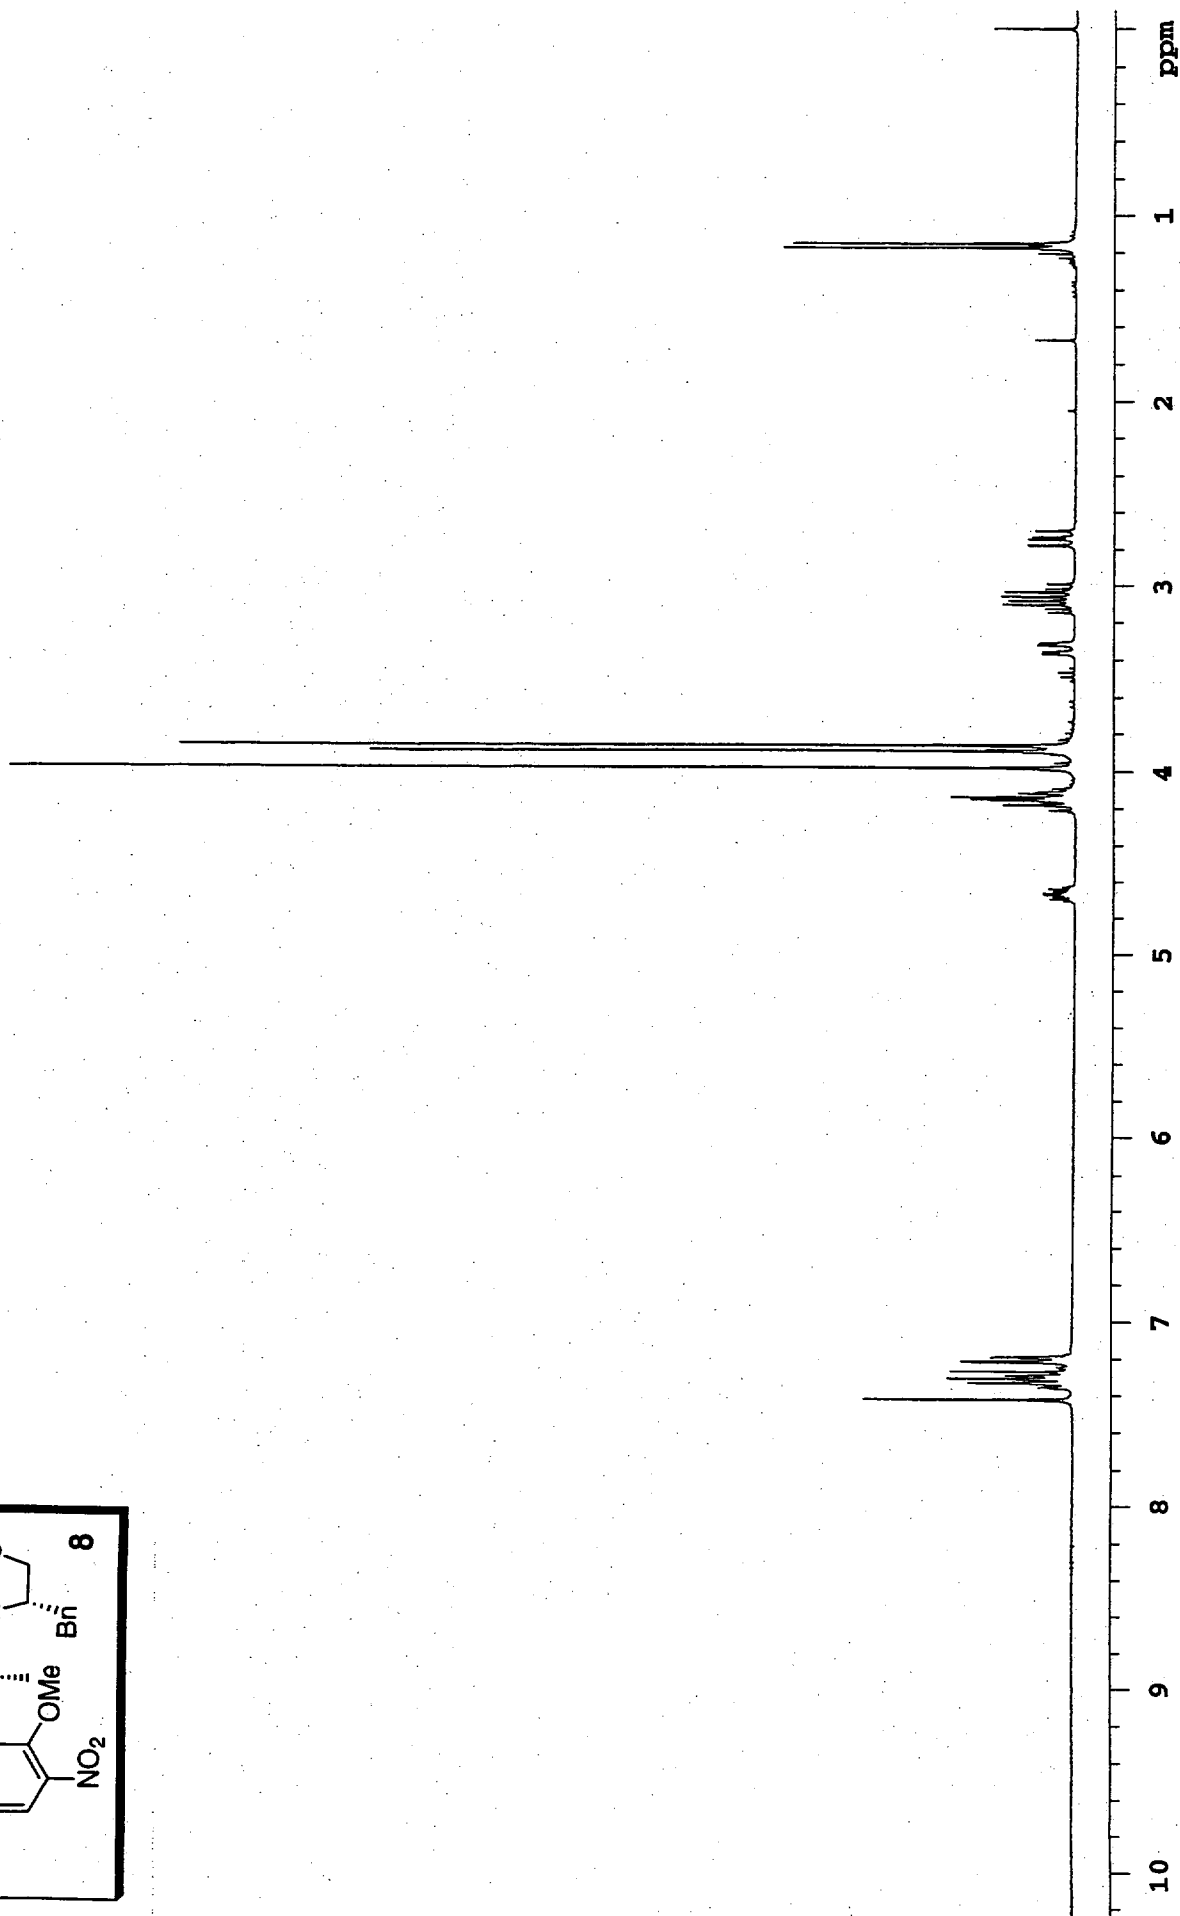

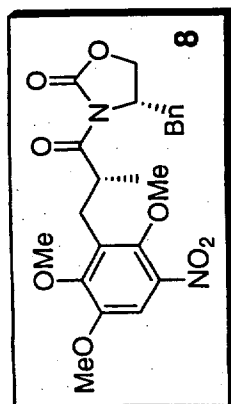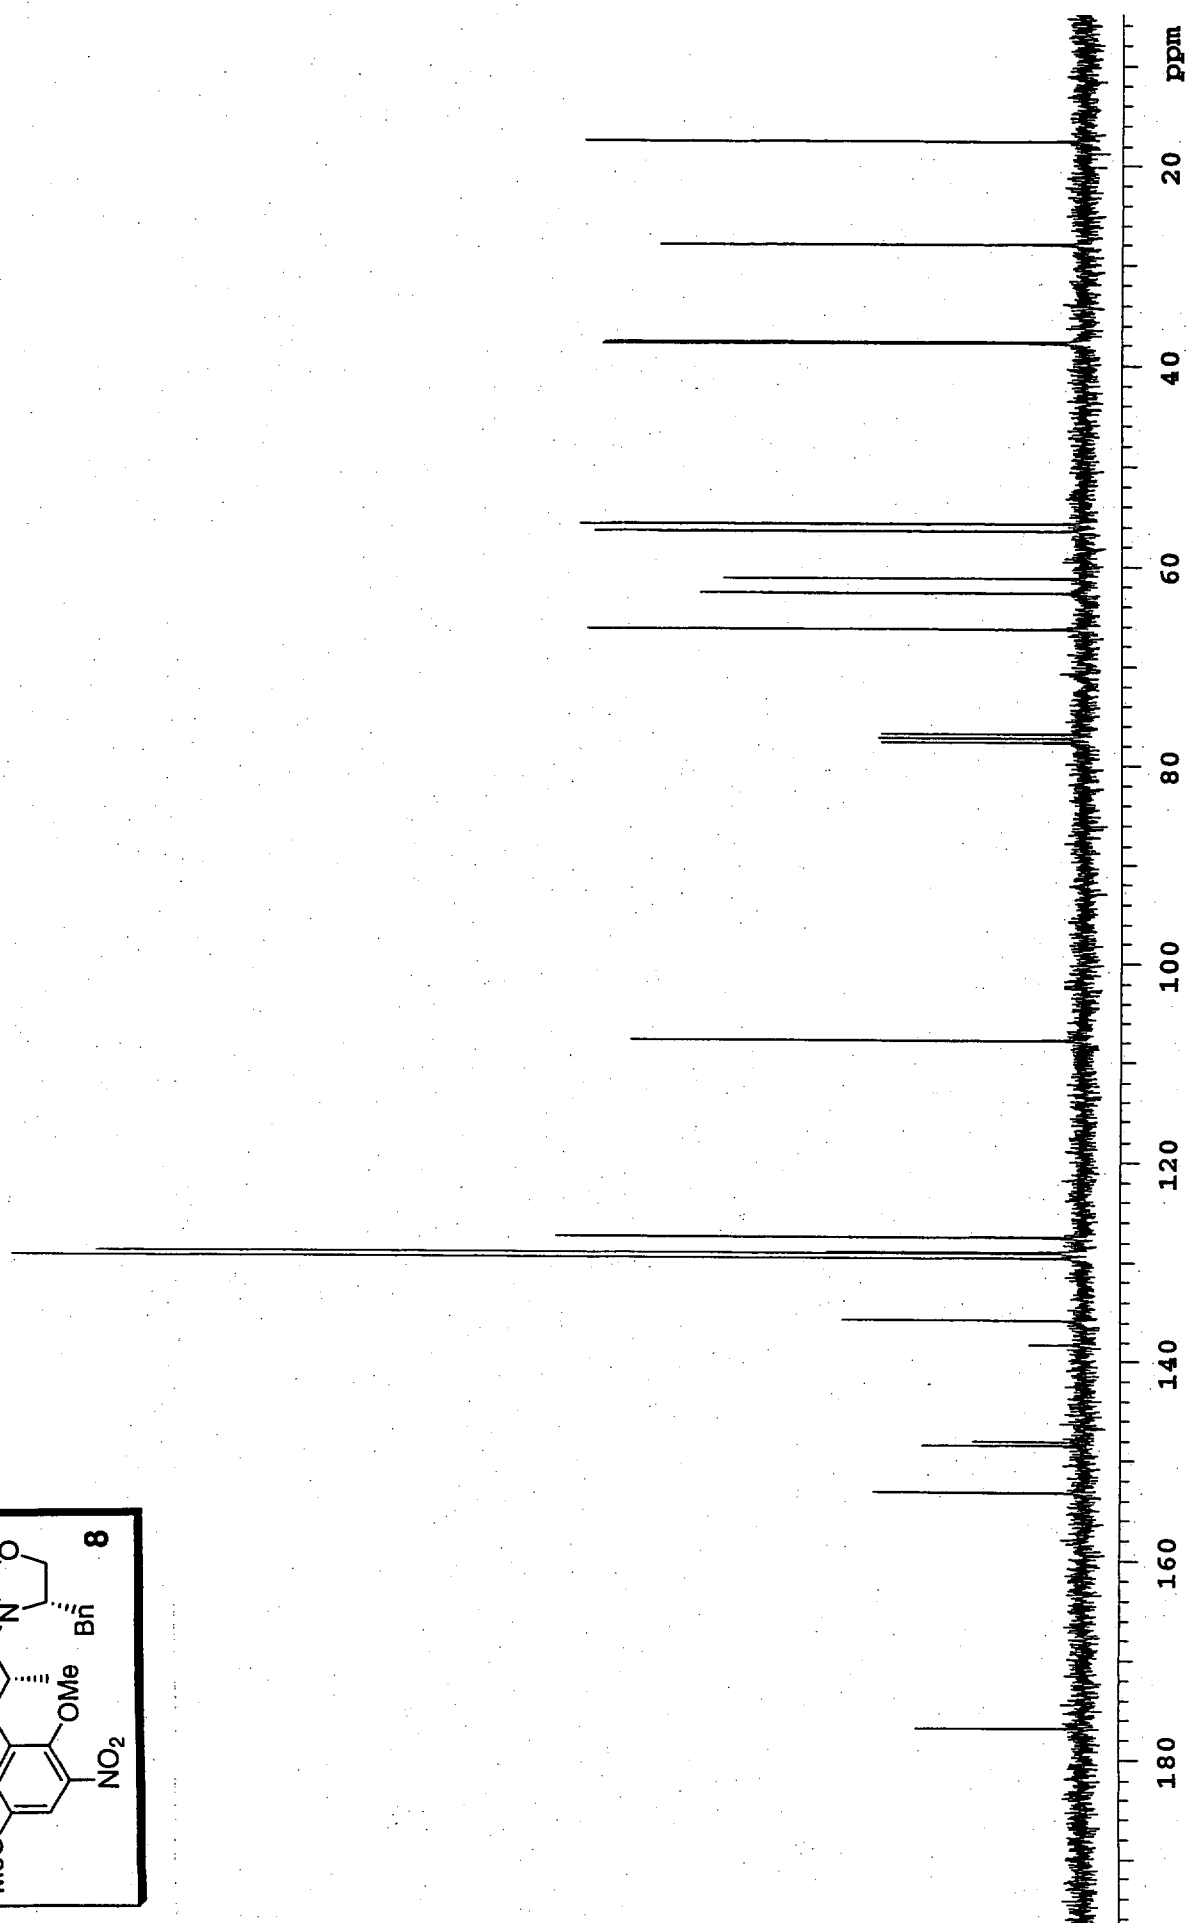

S16



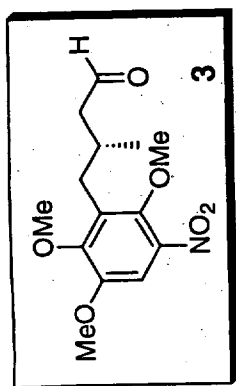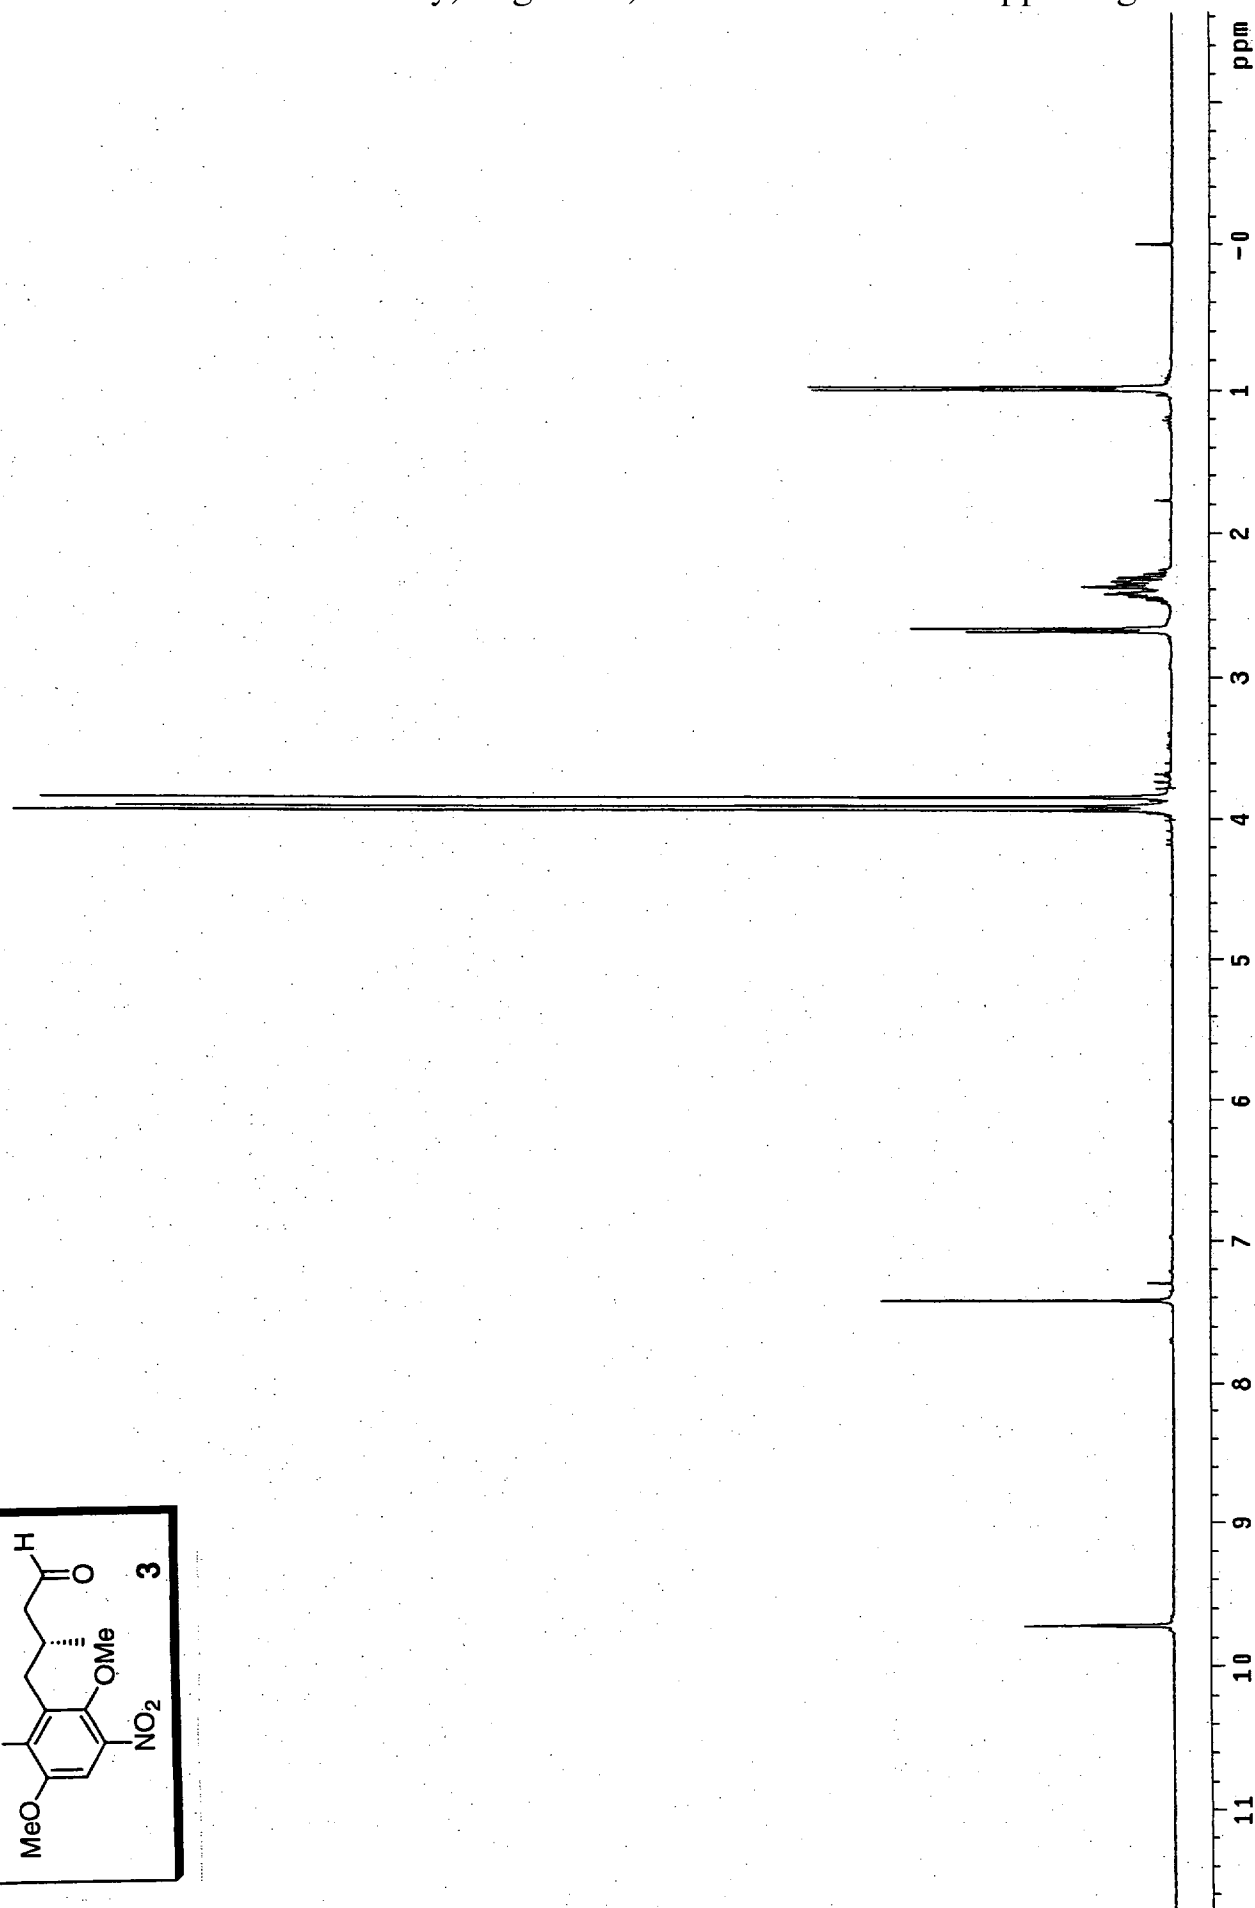

S17

S18

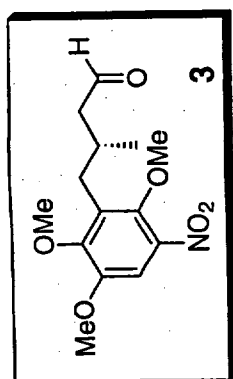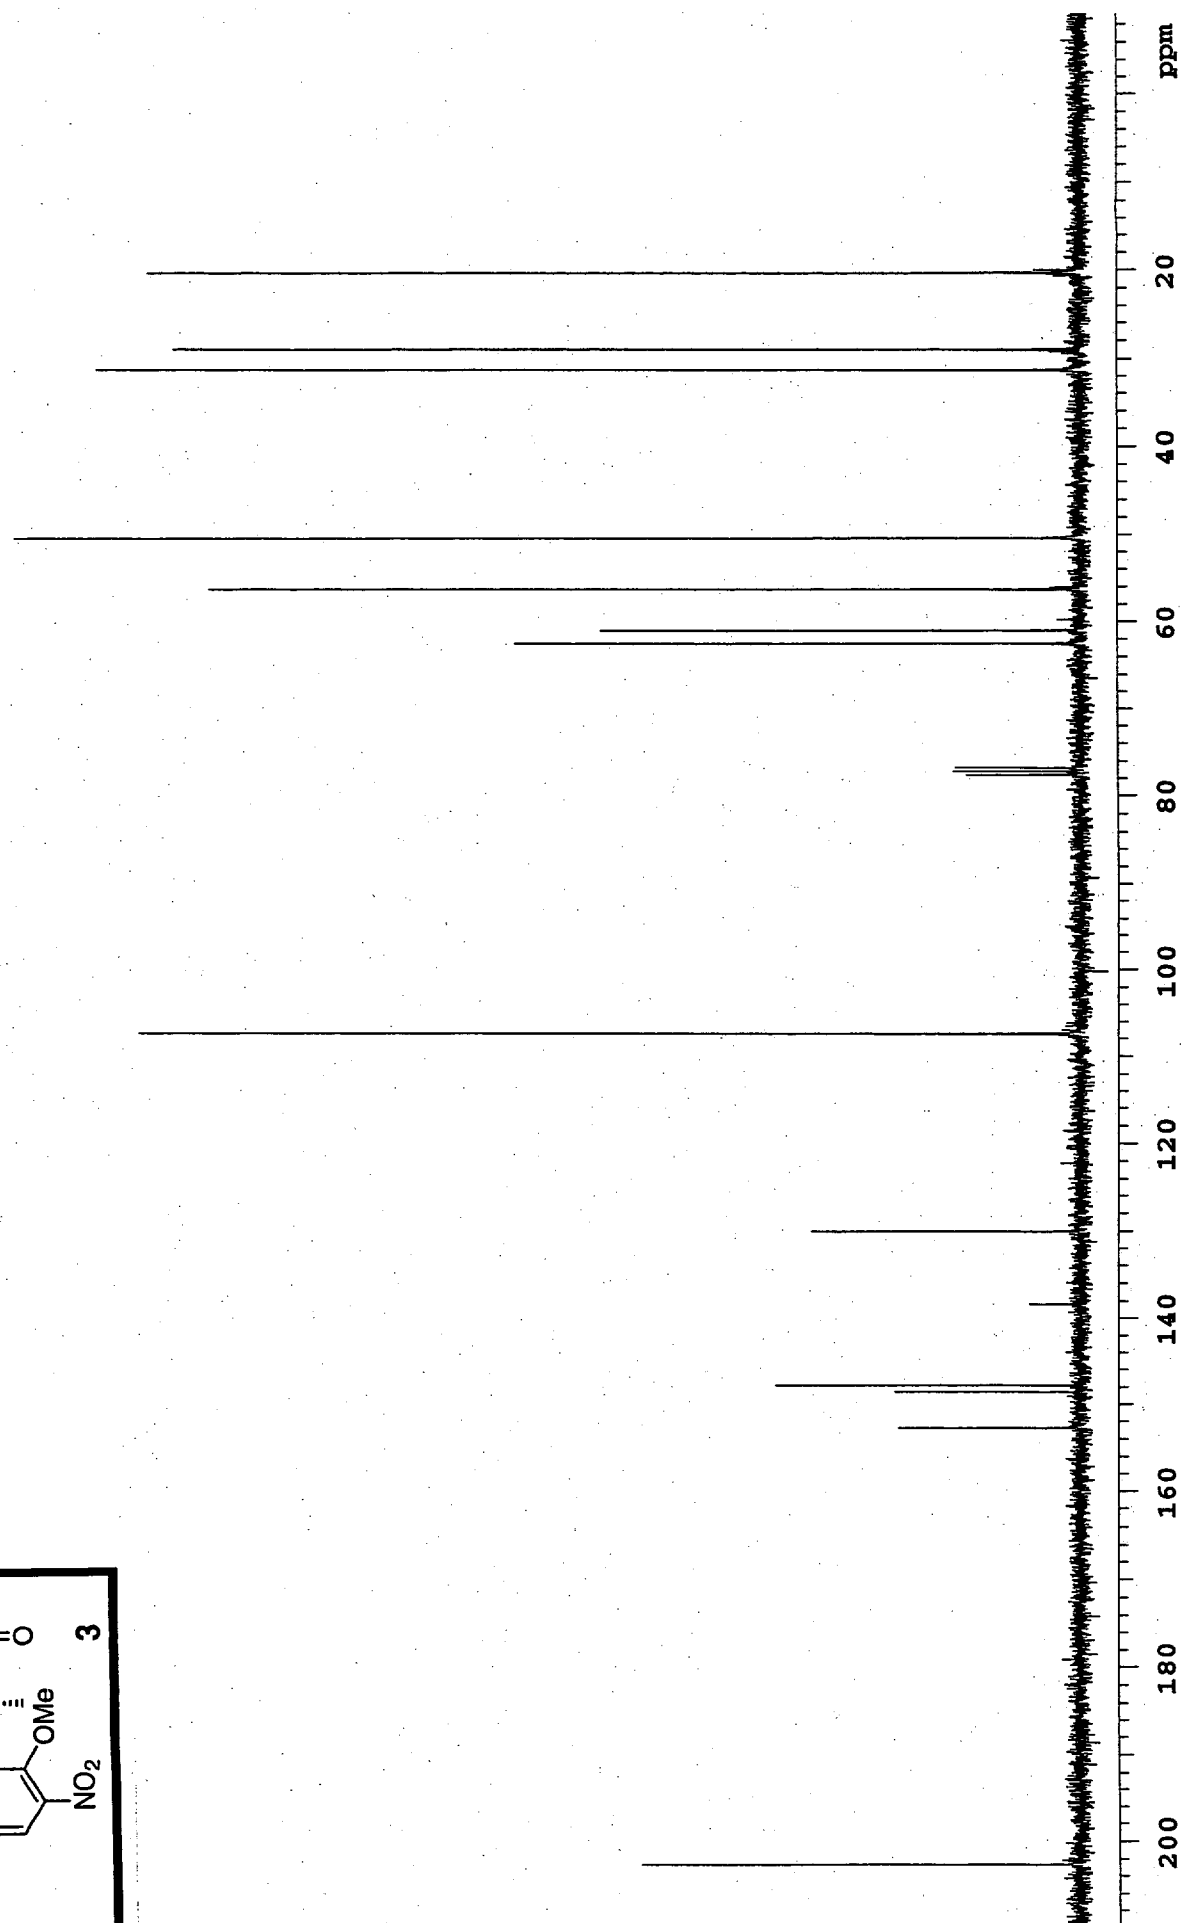

519

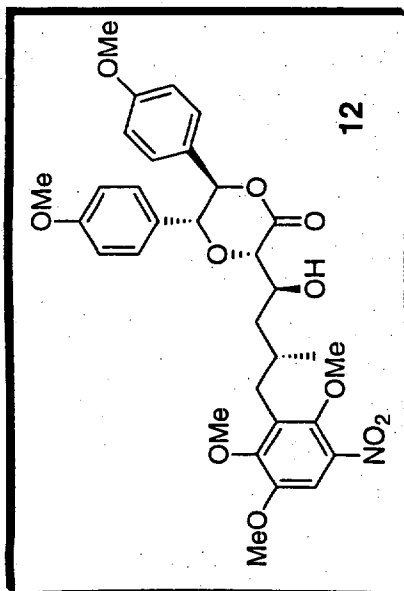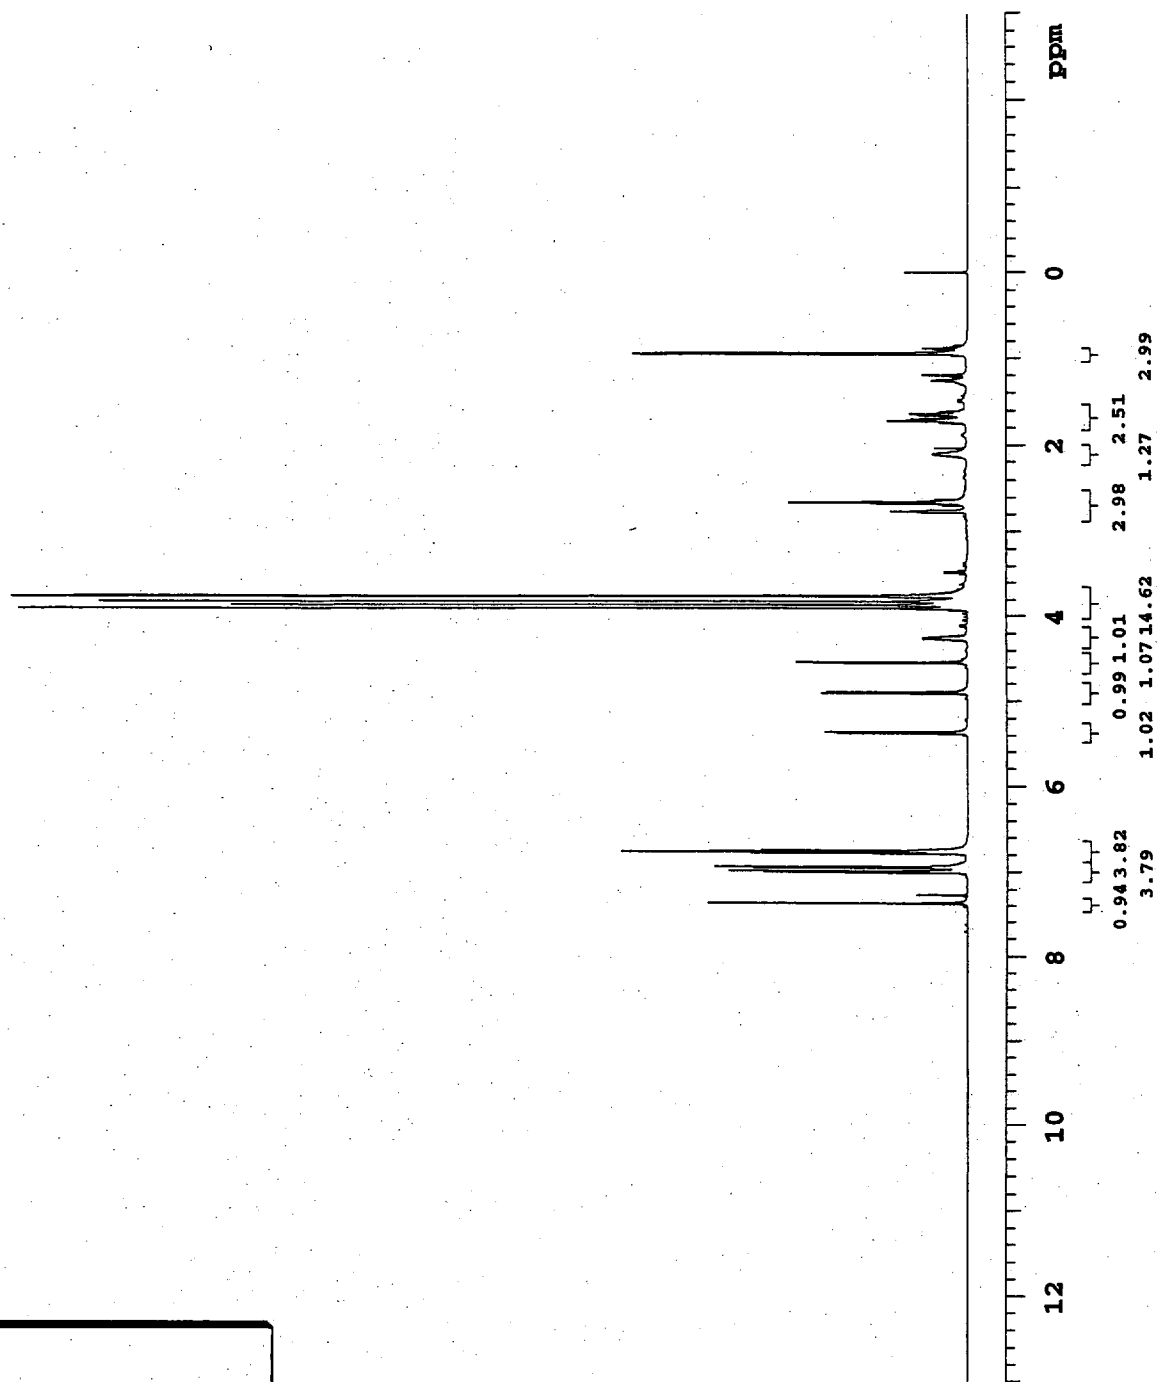

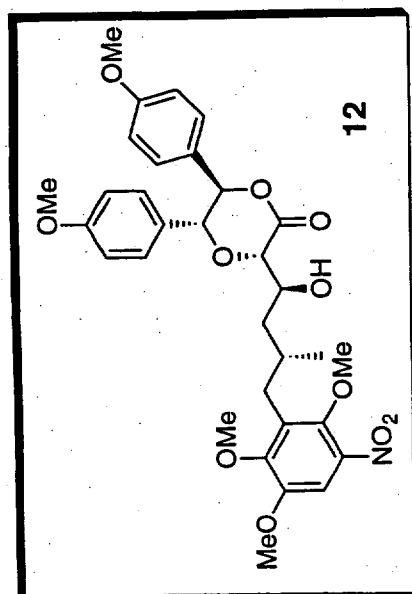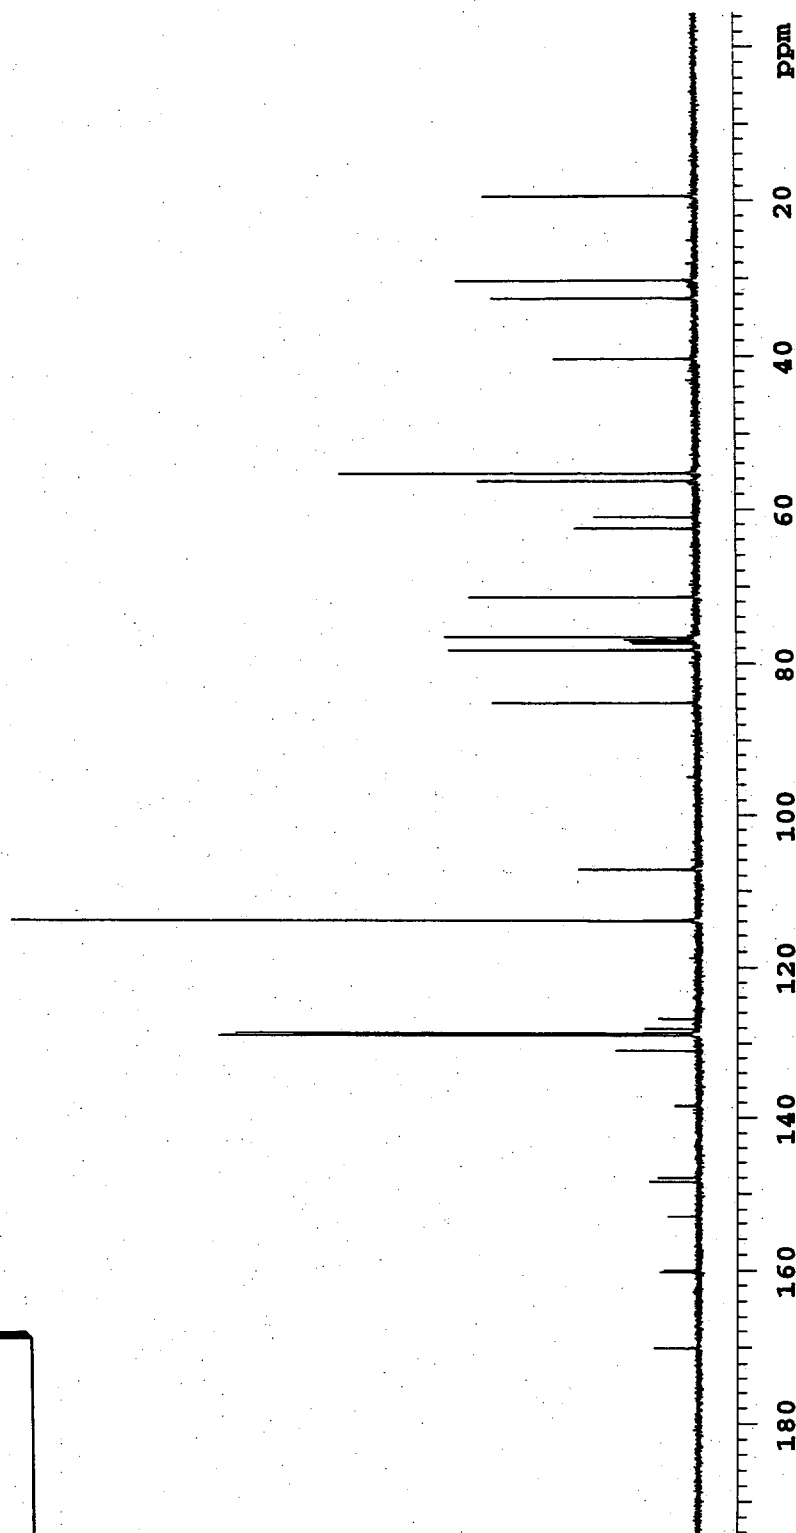

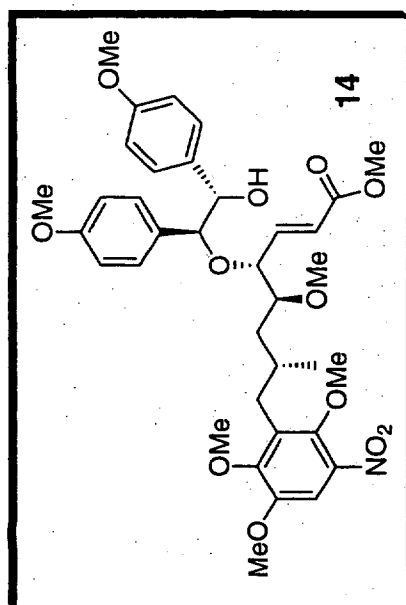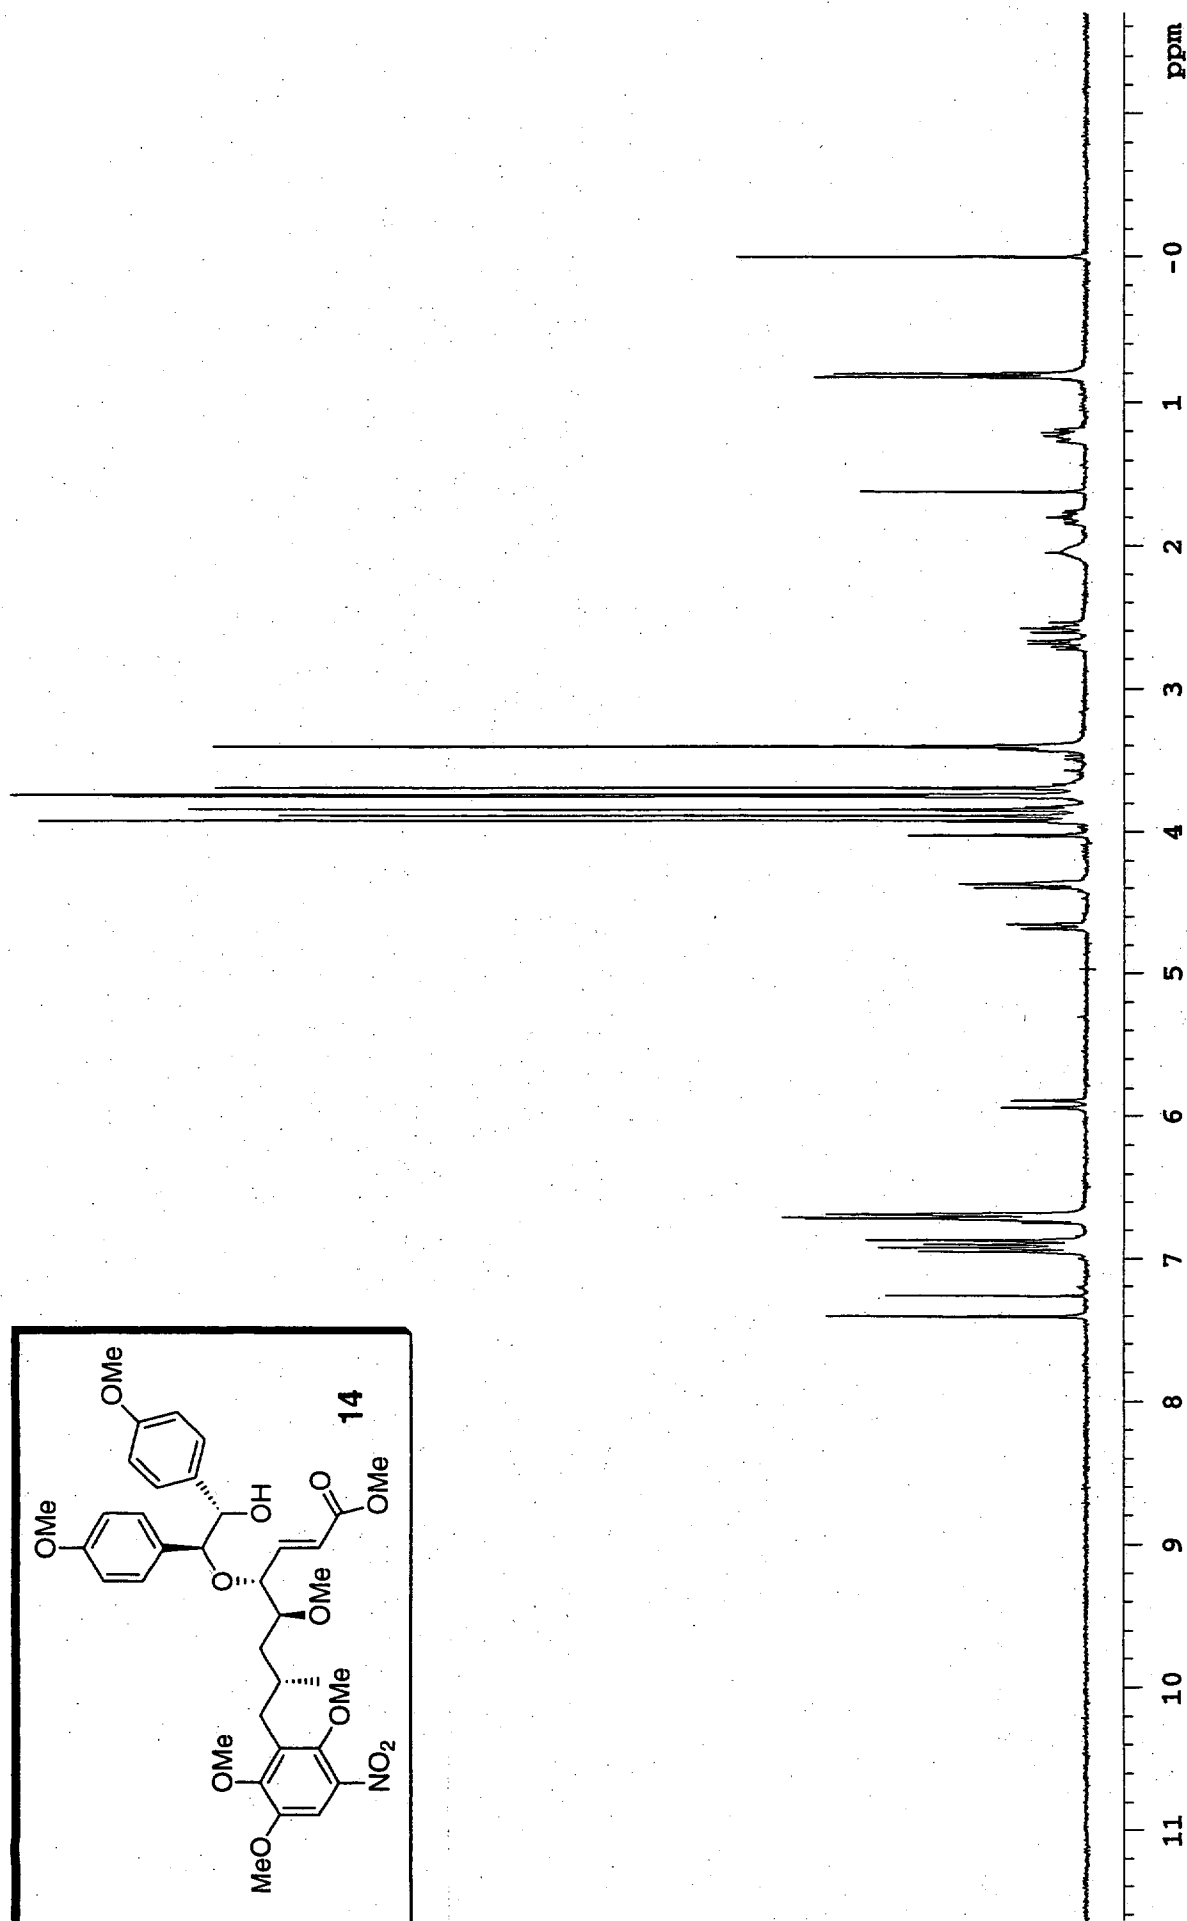

1es

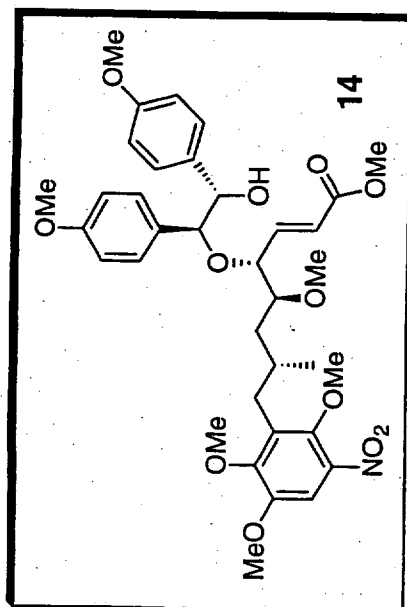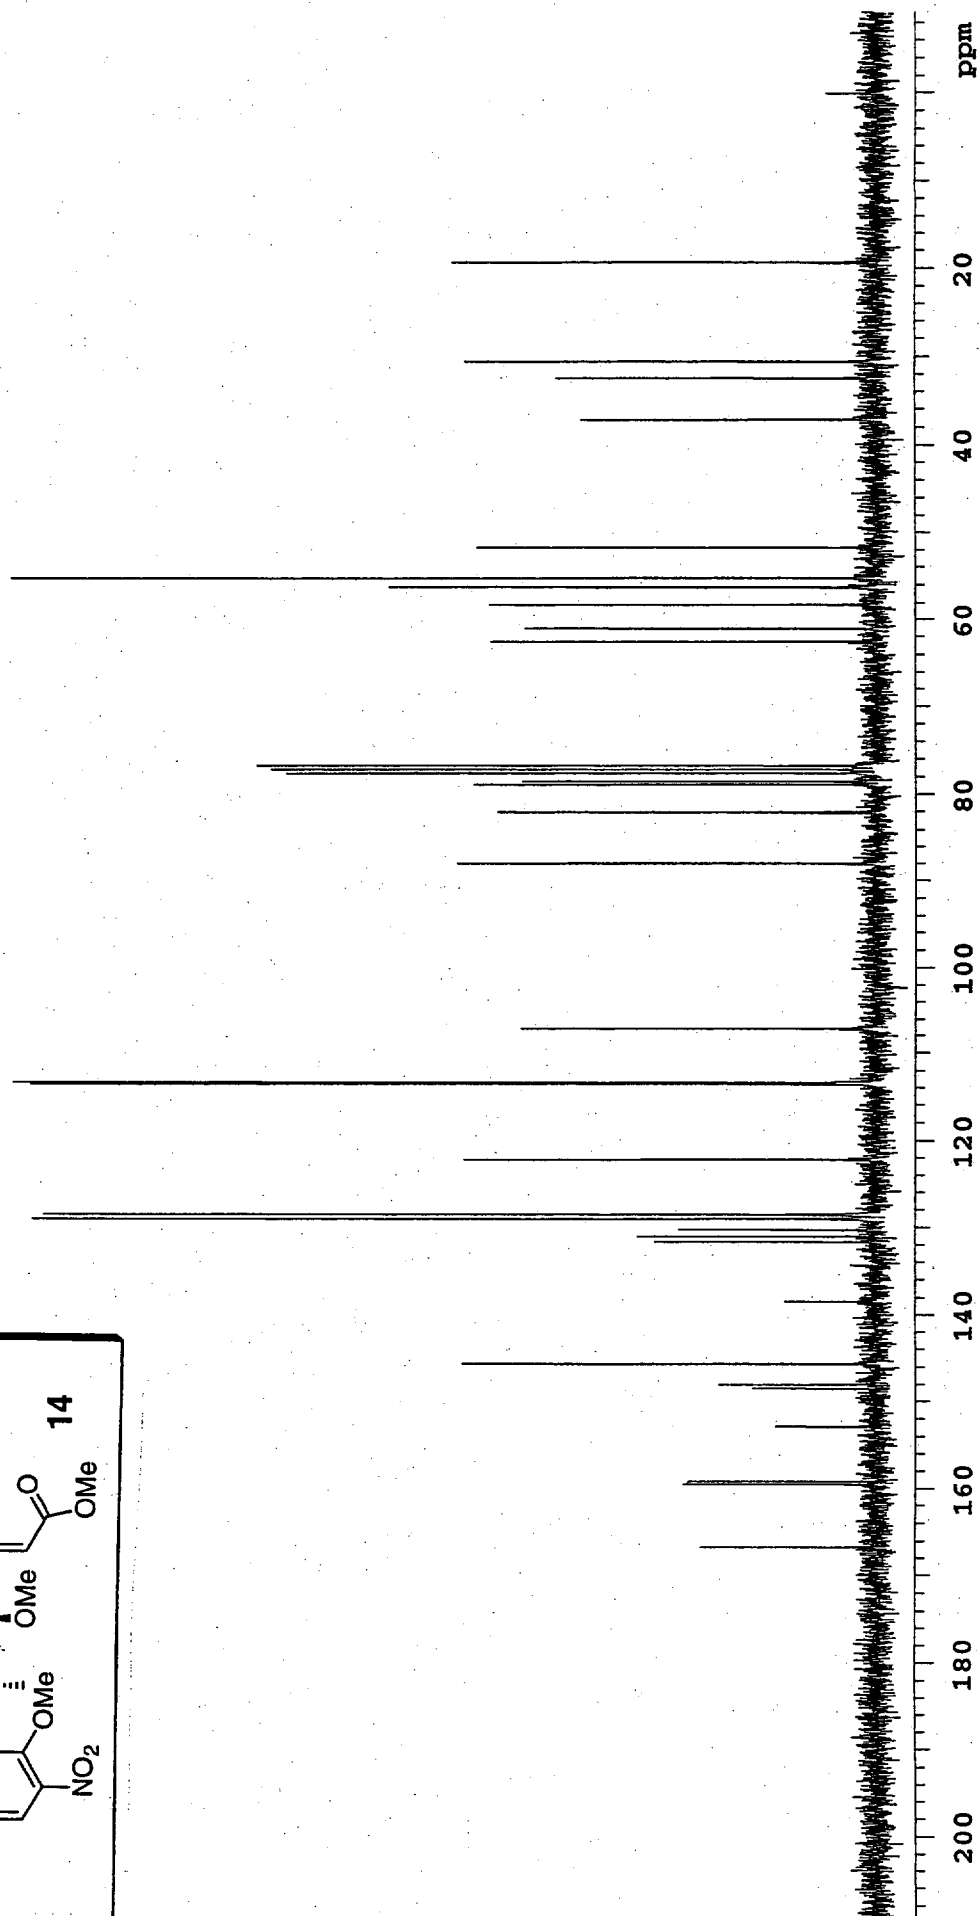

522

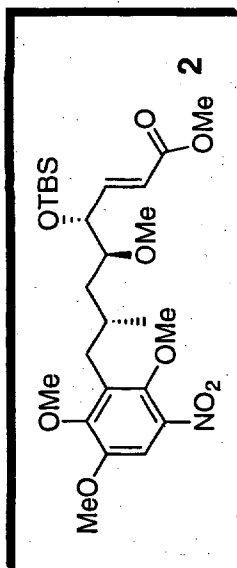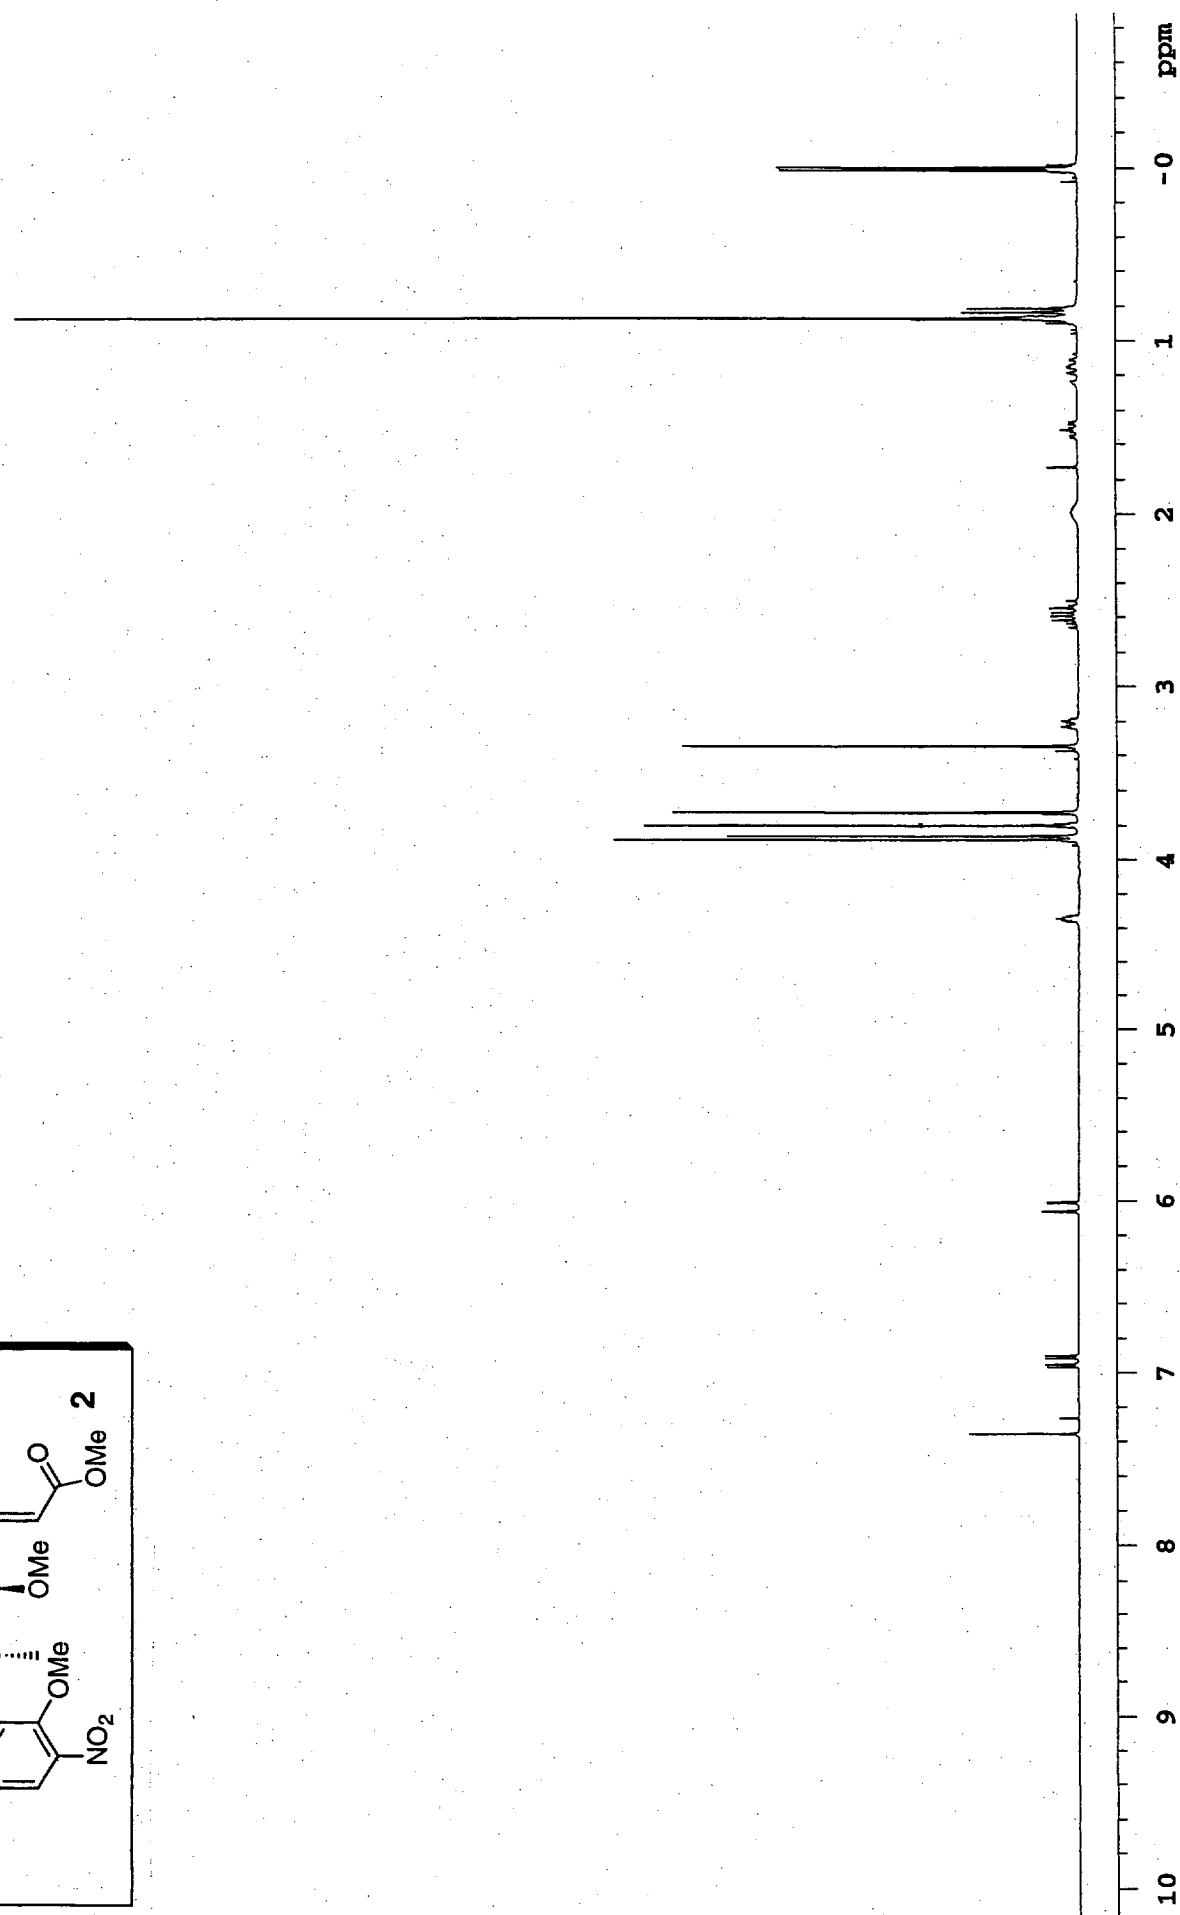

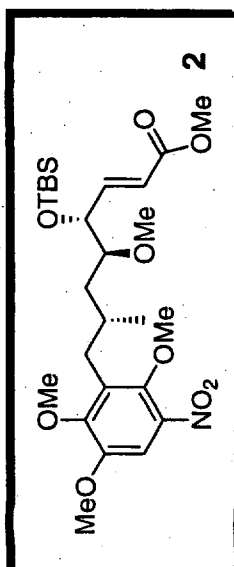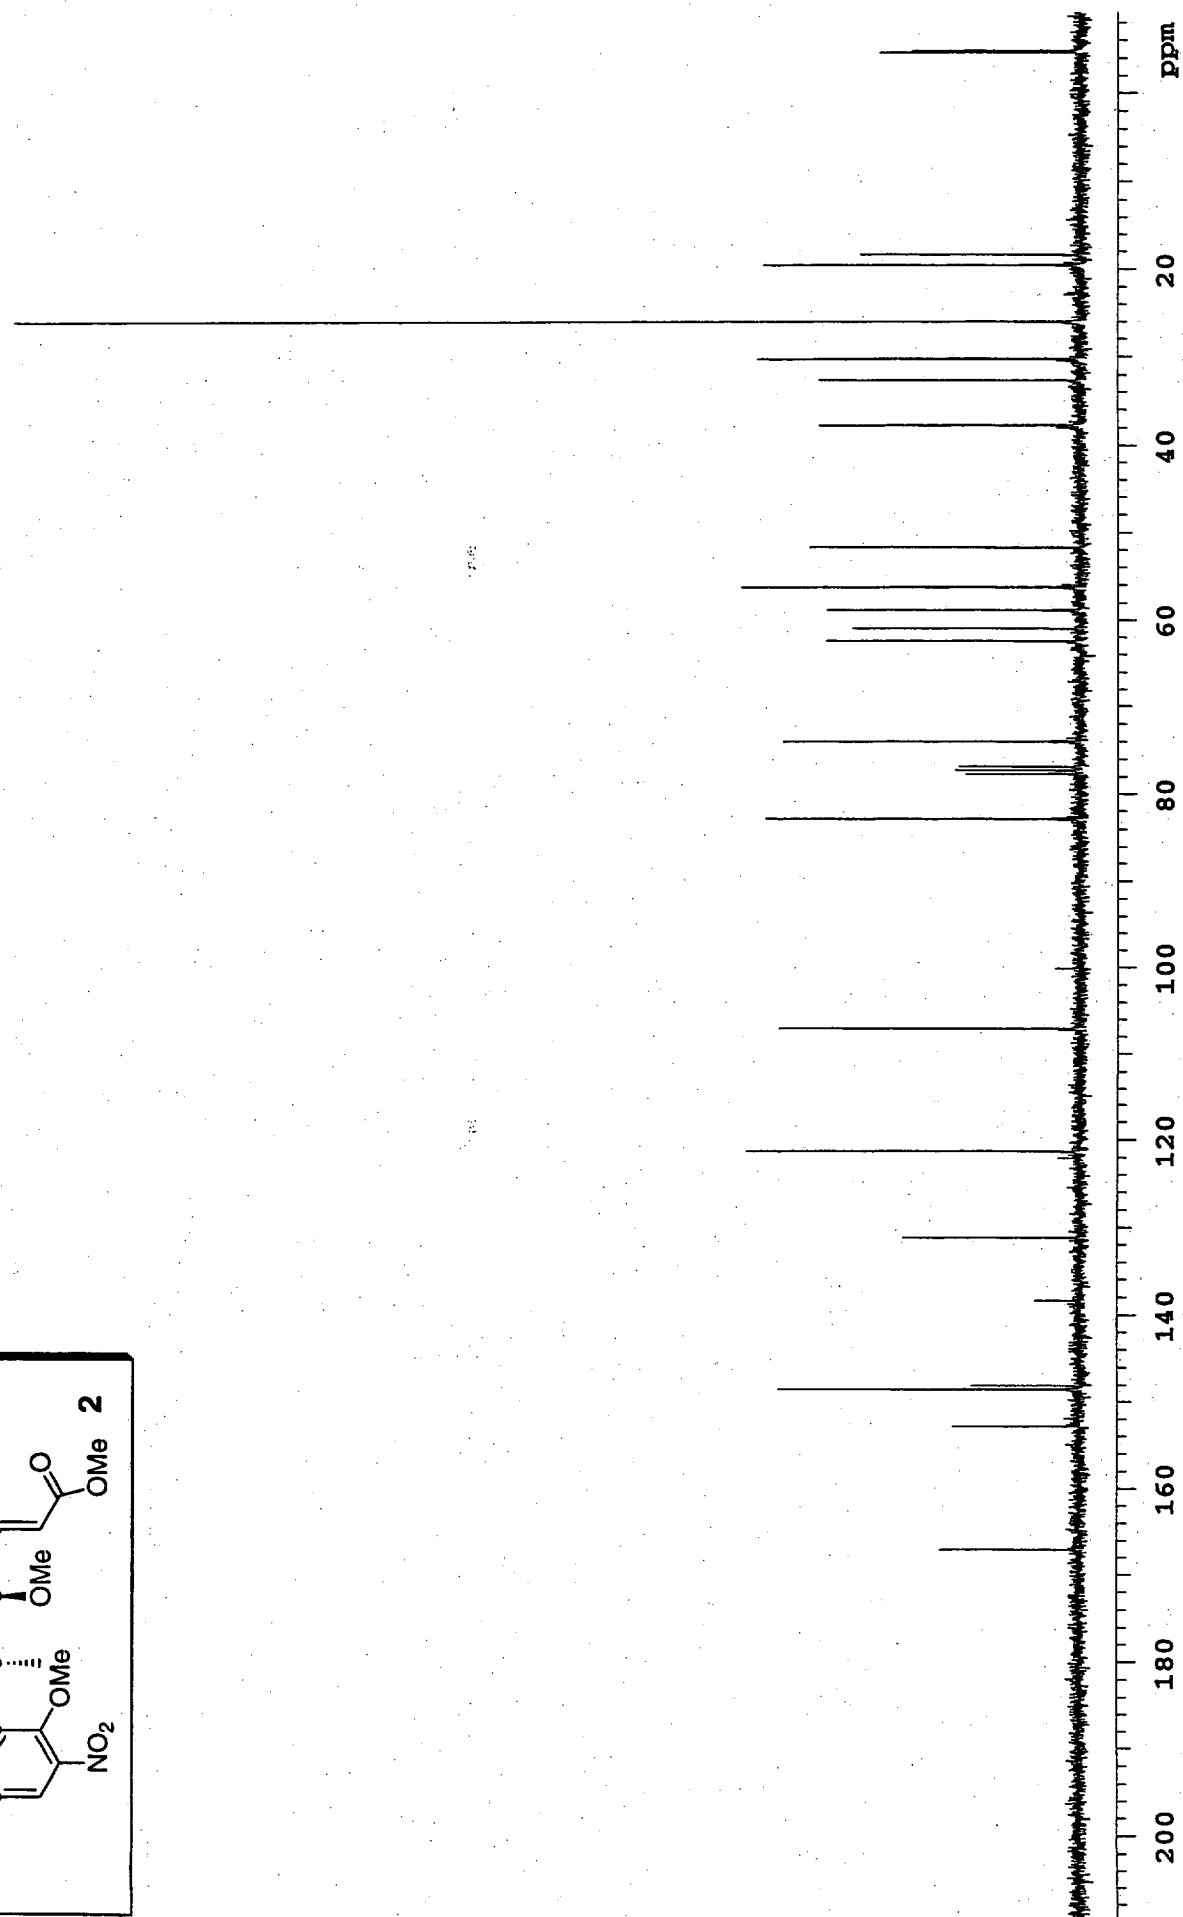

524



525

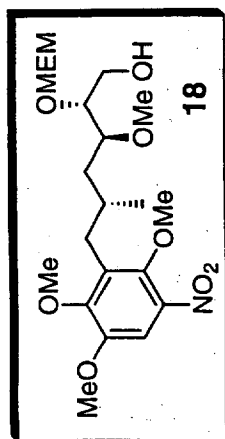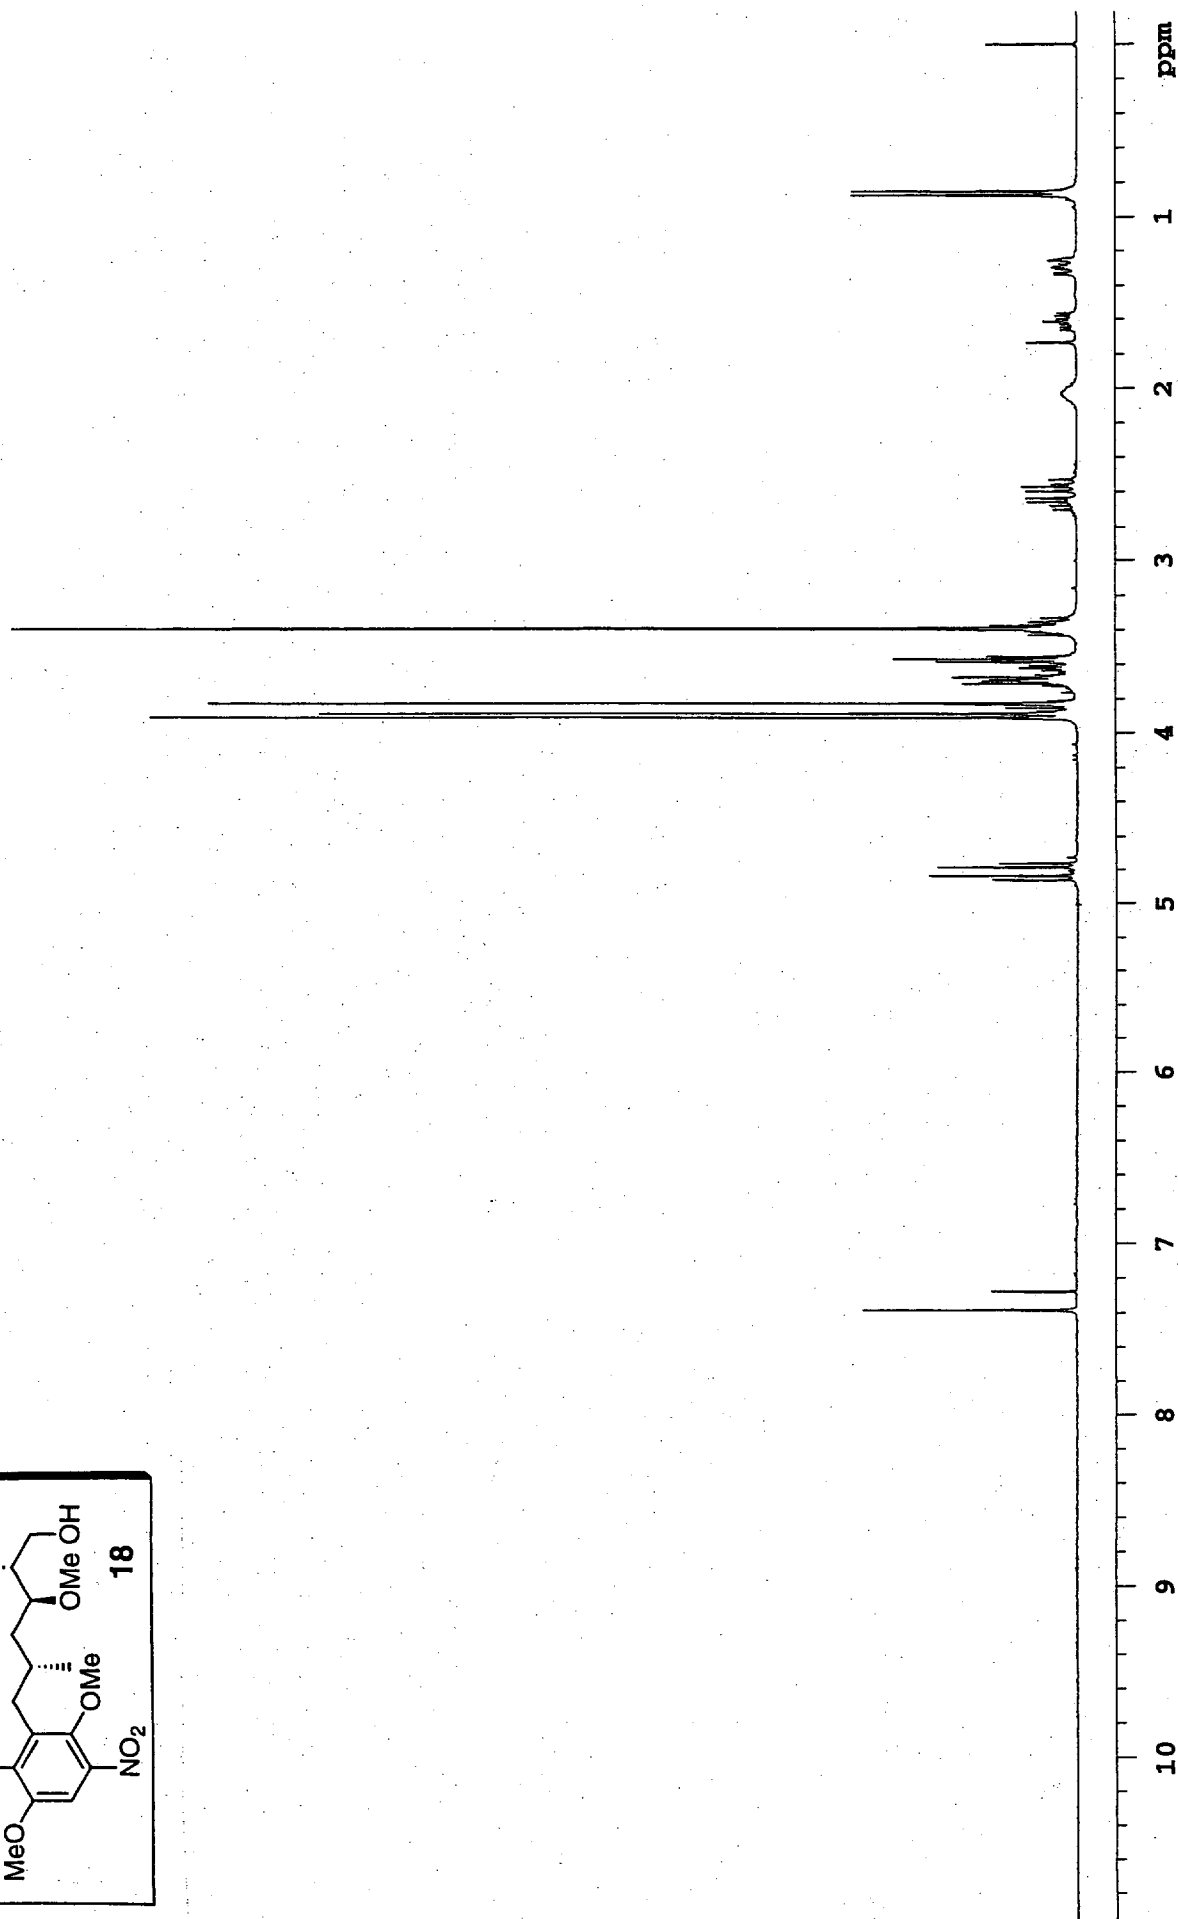

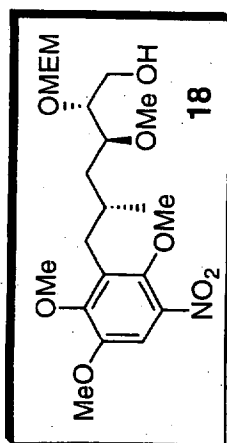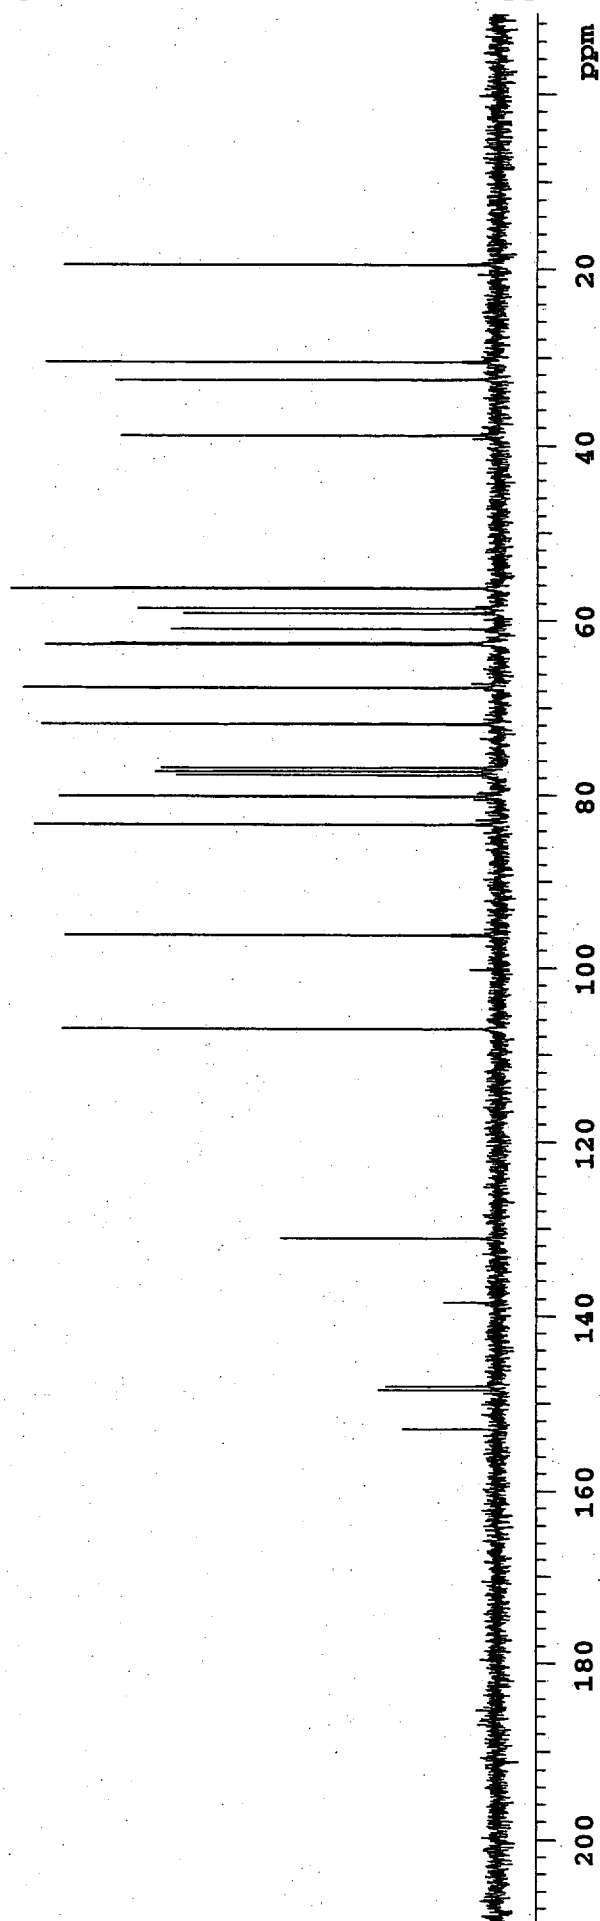

6260

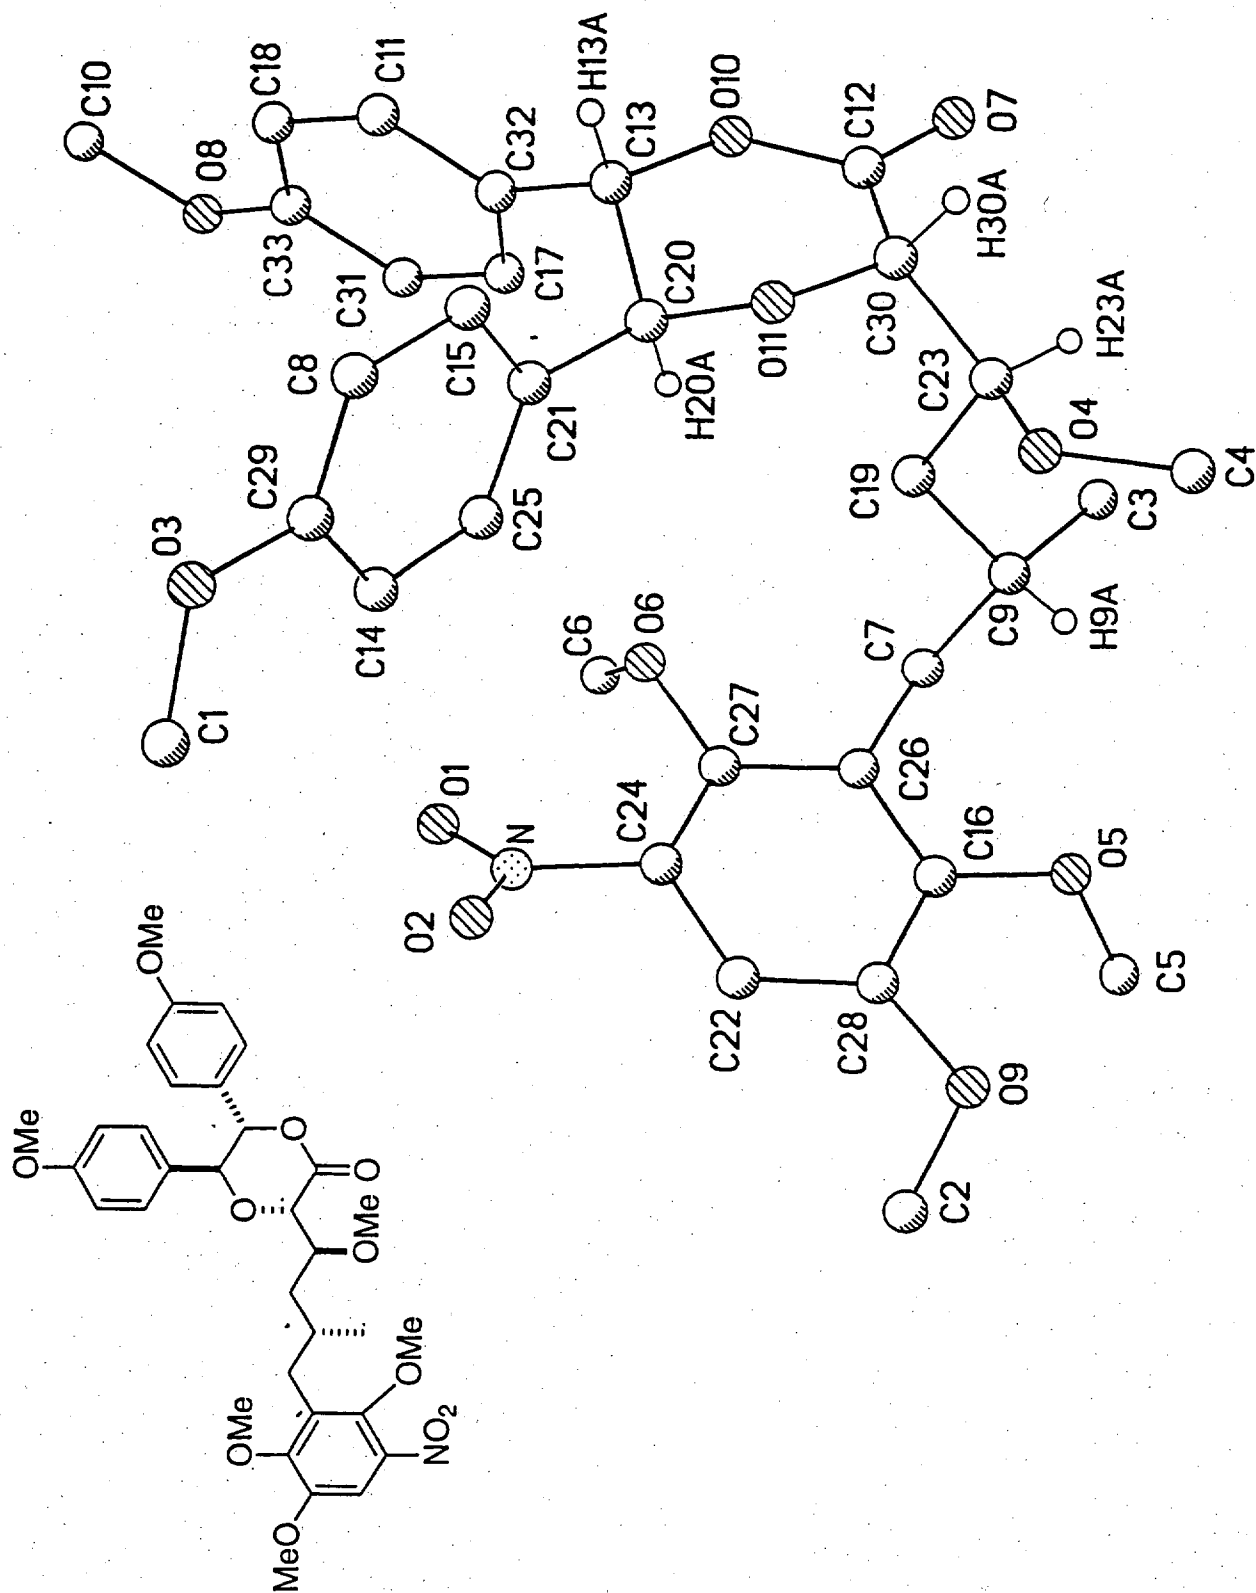

Table 1. Crystal data and structure refinement for 1.

|                                      |                                                                                                                       |
|--------------------------------------|-----------------------------------------------------------------------------------------------------------------------|
| Identification code                  | s115                                                                                                                  |
| Empirical formula                    | $C_{33}H_{39}NO_{11}$                                                                                                 |
| Formula weight                       | 625.65                                                                                                                |
| Temperature                          | 293(2) K                                                                                                              |
| Wavelength                           | 0.71073 Å                                                                                                             |
| Crystal system                       | Orthorhombic                                                                                                          |
| Space group                          | $P2_12_12_1$                                                                                                          |
| Unit cell dimensions                 | $a = 9.629(6)$ Å $\alpha = 90^\circ$<br>$b = 17.661(3)$ Å $\beta = 90^\circ$<br>$c = 19.081(3)$ Å $\gamma = 90^\circ$ |
| Volume, Z                            | 3245(2) Å <sup>3</sup> , 4                                                                                            |
| Density (calculated)                 | 1.281 Mg/m <sup>3</sup>                                                                                               |
| Absorption coefficient               | 0.096 mm <sup>-1</sup>                                                                                                |
| F(000)                               | 1328                                                                                                                  |
| Crystal size                         | 0.5 x 0.4 x 0.4 mm                                                                                                    |
| $\theta$ range for data collection   | 2.13 to 24.98°                                                                                                        |
| Limiting indices                     | $0 \leq h \leq 11, 0 \leq k \leq 21, -1 \leq l \leq 22$                                                               |
| Reflections collected                | 3415                                                                                                                  |
| Independent reflections              | 3385 ( $R_{int} = 0.0121$ )                                                                                           |
| Refinement method                    | Full-matrix least-squares on $F^2$                                                                                    |
| Data / restraints / parameters       | 3383 / 0 / 428                                                                                                        |
| Goodness-of-fit on $F^2$             | 1.055                                                                                                                 |
| Final R indices [ $I > 2\sigma(I)$ ] | $R1 = 0.0505, wR2 = 0.0999$                                                                                           |
| R indices (all data)                 | $R1 = 0.1105, wR2 = 0.1291$                                                                                           |
| Absolute structure parameter         | -1(2)                                                                                                                 |
| Extinction coefficient               | 0.0016(5)                                                                                                             |
| Largest diff. peak and hole          | 0.123 and -0.138 eÅ <sup>-3</sup>                                                                                     |

Table 2. Atomic coordinates [ $\times 10^4$ ] and equivalent isotropic displacement parameters [ $\text{\AA}^2 \times 10^3$ ] for 1.  $U(\text{eq})$  is defined as one third of the trace of the orthogonalized  $U_{ij}$  tensor.

|       | x        | y       | z        | $U(\text{eq})$ |
|-------|----------|---------|----------|----------------|
| O(1)  | 10571(4) | 2998(2) | 811(2)   | 87(1)          |
| C(1)  | 10128(5) | 3567(3) | 538(3)   | 67(2)          |
| O(2)  | 10057(4) | 3586(2) | -168(2)  | 70(1)          |
| C(3)  | 9617(5)  | 4278(3) | -528(3)  | 58(1)          |
| C(4)  | 8604(5)  | 4709(3) | -80(2)   | 52(1)          |
| O(5)  | 9255(4)  | 4882(2) | 573(2)   | 61(1)          |
| C(6)  | 9665(5)  | 4234(3) | 964(3)   | 57(1)          |
| C(7)  | 9035(5)  | 4034(3) | -1226(3) | 52(1)          |
| C(8)  | 9607(6)  | 4299(3) | -1841(3) | 67(2)          |
| C(9)  | 9088(6)  | 4085(3) | -2489(3) | 69(2)          |
| C(10) | 7997(6)  | 3598(3) | -2524(3) | 61(1)          |
| O(10) | 7435(4)  | 3337(2) | -3137(2) | 86(1)          |
| C(11) | 8009(9)  | 3610(4) | -3780(3) | 105(2)         |
| C(12) | 7398(5)  | 3323(3) | -1917(3) | 61(1)          |
| C(13) | 7910(5)  | 3541(3) | -1277(3) | 60(1)          |
| C(14) | 8116(5)  | 5447(3) | -388(3)  | 54(1)          |
| C(15) | 9023(6)  | 6020(3) | -584(3)  | 73(2)          |
| C(16) | 8520(7)  | 6702(3) | -821(3)  | 85(2)          |
| C(17) | 7120(6)  | 6834(3) | -868(3)  | 65(2)          |
| O(17) | 6722(5)  | 7532(2) | -1112(2) | 92(1)          |
| C(18) | 5299(8)  | 7717(4) | -1046(5) | 126(3)         |
| C(19) | 6210(6)  | 6271(3) | -689(3)  | 64(2)          |
| C(20) | 6713(5)  | 5590(3) | -460(3)  | 61(1)          |
| C(21) | 8599(5)  | 3996(3) | 1517(3)  | 62(1)          |
| O(21) | 8413(5)  | 4634(2) | 1971(2)  | 88(1)          |
| C(22) | 8624(7)  | 4502(4) | 2687(3)  | 95(2)          |
| C(23) | 7209(5)  | 3755(3) | 1221(3)  | 61(1)          |
| C(24) | 6248(5)  | 3364(3) | 1734(3)  | 69(2)          |
| C(25) | 6796(8)  | 2587(3) | 1966(5)  | 116(3)         |
| C(26) | 4803(5)  | 3278(3) | 1412(3)  | 73(2)          |
| C(27) | 4026(5)  | 4011(3) | 1346(3)  | 59(1)          |
| C(28) | 3892(5)  | 4387(3) | 707(3)   | 62(1)          |
| O(28) | 4548(4)  | 4110(2) | 124(2)   | 79(1)          |
| C(29) | 3768(7)  | 3571(5) | -278(4)  | 105(2)         |
| C(30) | 3226(6)  | 5080(4) | 707(3)   | 68(2)          |
| N(30) | 3067(5)  | 5529(4) | 53(4)    | 88(2)          |
| O(30) | 2945(6)  | 5198(3) | -497(3)  | 126(2)         |
| O(31) | 3063(7)  | 6208(3) | 97(3)    | 147(3)         |
| C(32) | 2654(5)  | 5399(3) | 1298(3)  | 67(2)          |
| C(33) | 2721(5)  | 5019(3) | 1913(3)  | 64(1)          |
| O(33) | 2177(4)  | 5267(2) | 2533(2)  | 87(1)          |
| C(34) | 1296(8)  | 5917(4) | 2510(4)  | 114(3)         |
| C(35) | 3411(5)  | 4326(3) | 1937(3)  | 63(1)          |
| O(35) | 3633(4)  | 3961(2) | 2570(2)  | 92(1)          |
| C(36) | 2466(8)  | 3672(4) | 2925(4)  | 115(3)         |

Table 3. Bond lengths [Å] and angles [°] for 1.

|                   |          |                   |          |
|-------------------|----------|-------------------|----------|
| O(1)-C(1)         | 1.210(6) | C(1)-O(2)         | 1.349(7) |
| C(1)-C(6)         | 1.498(7) | O(2)-C(3)         | 1.465(6) |
| C(3)-C(4)         | 1.502(6) | C(3)-C(7)         | 1.508(7) |
| C(4)-O(5)         | 1.429(5) | C(4)-C(14)        | 1.506(7) |
| O(5)-C(6)         | 1.423(5) | C(6)-C(21)        | 1.532(7) |
| C(7)-C(8)         | 1.379(6) | C(7)-C(13)        | 1.394(6) |
| C(8)-C(9)         | 1.386(7) | C(9)-C(10)        | 1.359(7) |
| C(10)-O(10)       | 1.368(6) | C(10)-C(12)       | 1.383(7) |
| O(10)-C(11)       | 1.429(7) | C(12)-C(13)       | 1.371(7) |
| C(14)-C(20)       | 1.381(7) | C(14)-C(15)       | 1.386(7) |
| C(15)-C(16)       | 1.375(7) | C(16)-C(17)       | 1.371(8) |
| C(17)-C(19)       | 1.367(7) | C(17)-O(17)       | 1.374(6) |
| O(17)-C(18)       | 1.415(8) | C(19)-C(20)       | 1.369(7) |
| C(21)-O(21)       | 1.432(6) | C(21)-C(23)       | 1.514(7) |
| O(21)-C(22)       | 1.400(6) | C(23)-C(24)       | 1.514(6) |
| C(24)-C(26)       | 1.529(7) | C(24)-C(25)       | 1.535(7) |
| C(26)-C(27)       | 1.501(7) | C(27)-C(35)       | 1.389(7) |
| C(27)-C(28)       | 1.394(7) | C(28)-O(28)       | 1.369(6) |
| C(28)-C(30)       | 1.383(8) | O(28)-C(29)       | 1.435(7) |
| C(30)-C(32)       | 1.375(8) | C(30)-N(30)       | 1.486(7) |
| N(30)-O(31)       | 1.202(7) | N(30)-O(30)       | 1.207(7) |
| C(32)-C(33)       | 1.353(7) | C(33)-O(33)       | 1.365(6) |
| C(33)-C(35)       | 1.393(7) | O(33)-C(34)       | 1.428(7) |
| C(35)-O(35)       | 1.386(6) | O(35)-C(36)       | 1.408(7) |
| O(1)-C(1)-O(2)    | 117.9(6) | O(1)-C(1)-C(6)    | 121.6(6) |
| O(2)-C(1)-C(6)    | 120.5(5) | C(1)-O(2)-C(3)    | 120.2(4) |
| O(2)-C(3)-C(4)    | 110.1(4) | O(2)-C(3)-C(7)    | 106.4(4) |
| C(4)-C(3)-C(7)    | 114.0(4) | O(5)-C(4)-C(3)    | 108.7(4) |
| O(5)-C(4)-C(14)   | 106.9(4) | C(3)-C(4)-C(14)   | 114.8(4) |
| C(6)-O(5)-C(4)    | 114.0(3) | O(5)-C(6)-C(1)    | 115.6(4) |
| O(5)-C(6)-C(21)   | 113.3(4) | C(1)-C(6)-C(21)   | 111.0(4) |
| C(8)-C(7)-C(13)   | 117.5(5) | C(8)-C(7)-C(3)    | 120.5(4) |
| C(13)-C(7)-C(3)   | 122.0(5) | C(7)-C(8)-C(9)    | 121.6(5) |
| C(10)-C(9)-C(8)   | 119.6(5) | C(9)-C(10)-O(10)  | 124.1(5) |
| C(9)-C(10)-C(12)  | 120.2(5) | O(10)-C(10)-C(12) | 115.7(5) |
| C(10)-O(10)-C(11) | 117.9(4) | C(13)-C(12)-C(10) | 119.8(5) |
| C(12)-C(13)-C(7)  | 121.2(5) | C(20)-C(14)-C(15) | 117.2(5) |
| C(20)-C(14)-C(4)  | 120.1(4) | C(15)-C(14)-C(4)  | 122.7(4) |
| C(16)-C(15)-C(14) | 120.4(5) | C(17)-C(16)-C(15) | 121.1(5) |
| C(19)-C(17)-C(16) | 119.4(5) | C(19)-C(17)-O(17) | 123.9(5) |
| C(16)-C(17)-O(17) | 116.6(5) | C(17)-O(17)-C(18) | 116.5(5) |
| C(17)-C(19)-C(20) | 119.4(5) | C(19)-C(20)-C(14) | 122.6(5) |
| O(21)-C(21)-C(23) | 109.7(4) | O(21)-C(21)-C(6)  | 106.6(4) |
| C(23)-C(21)-C(6)  | 114.4(4) | C(22)-O(21)-C(21) | 116.2(5) |
| C(21)-C(23)-C(24) | 115.3(5) | C(23)-C(24)-C(26) | 110.0(4) |
| C(23)-C(24)-C(25) | 112.5(5) | C(26)-C(24)-C(25) | 109.9(5) |
| C(27)-C(26)-C(24) | 113.7(4) | C(35)-C(27)-C(28) | 118.6(5) |
| C(35)-C(27)-C(26) | 119.4(5) | C(28)-C(27)-C(26) | 122.0(5) |
| O(28)-C(28)-C(30) | 122.0(5) | O(28)-C(28)-C(27) | 119.9(5) |
| C(30)-C(28)-C(27) | 117.7(5) | C(28)-O(28)-C(29) | 115.4(4) |
| C(32)-C(30)-C(28) | 123.2(5) | C(32)-C(30)-N(30) | 115.4(6) |
| C(28)-C(30)-N(30) | 121.4(6) | O(31)-N(30)-O(30) | 123.0(7) |
| O(31)-N(30)-C(30) | 118.2(7) | O(30)-N(30)-C(30) | 118.8(6) |
| C(33)-C(32)-C(30) | 119.4(5) | C(32)-C(33)-O(33) | 125.1(5) |

C(32)-C(33)-C(35)

119.0(6)

O(33)-C(33)-C(35)

115.9(6)

C(33)-O(33)-C(34)

117.3(5)

O(35)-C(35)-C(27)

117.0(5)

O(35)-C(35)-C(33)

120.7(5)

C(27)-C(35)-C(33)

122.0(5)

C(35)-O(35)-C(36)

117.7(5)
